# Supplementary material
Source: MDPI journal article supplement (https://www.mdpi.com/2075-4701/13/5/993)

# Immersion Stability of Tartaric-Sulfuric Acid Anodized Aluminum Alloys

Florian Raffin <sup>1</sup>, Jacques Echouard <sup>2</sup> and Polina Volovitch <sup>1,3,\*</sup>

<sup>1</sup> Chimie ParisTech-CNRS, Institut de Recherche de Chimie Paris (IRCP), PSL University, 11 rue Pierre et Marie Curie, 75005 Paris, France; florian.raffin@chimieparistech.psl.eu

<sup>2</sup> Safran Landing Systems, 7 Rue Général Valérie André, 78140 Vélizy-Villacoublay, France

<sup>3</sup> Institut Photovoltaïque d'Île-de-France (IPVF), UMR 9006, CNRS, Ecole Polytechnique, IP Paris, Chimie ParisTech, PSL University, 91120 Palaiseau, France

\* Correspondence: polina.volovitch@chimieparistech.psl.eu

## Supplementary Materials:

**Figure S1.** Data of pore area from ImageJ (25-min anodizing and 45-min anodizing).

| 45-min<br>anodizing | Pore area<br>nm <sup>2</sup> | 25-min<br>anodizing | Pore area<br>nm <sup>2</sup> |
|---------------------|------------------------------|---------------------|------------------------------|
| 1                   | 57.892                       | 1                   | 315.327                      |
| 2                   | 160.681                      | 2                   | 126.609                      |
| 3                   | 281.191                      | 3                   | 267.551                      |
| 4                   | 340.265                      | 4                   | 182.747                      |
| 5                   | 151.229                      | 5                   | 367.882                      |
| 6                   | 185.491                      | 6                   | 286.661                      |
| 7                   | 303.639                      | 7                   | 130.192                      |
| 8                   | 301.276                      | 8                   | 229.329                      |
| 9                   | 99.244                       | 9                   | 373.854                      |
| 10                  | 64.981                       | 10                  | 167.219                      |
| 11                  | 111.059                      | 11                  | 197.08                       |
| 12                  | 204.395                      | 12                  | 139.747                      |
| 13                  | 70.888                       | 13                  | 68.082                       |
| 14                  | 46.078                       | 14                  | 68.082                       |
| 15                  | 346.172                      | 15                  | 266.356                      |
| 16                  | 134.688                      | 16                  | 59.721                       |
| 17                  | 239.839                      | 17                  | 230.523                      |
| 18                  | 53.166                       | 18                  | 96.748                       |
| 19                  | 193.762                      | 19                  | 63.304                       |
| 20                  | 218.573                      | 20                  | 345.188                      |
| 21                  | 89.792                       | 21                  | 126.609                      |
| 22                  | 366.257                      | 22                  | 209.024                      |
| 23                  | 23.629                       | 23                  | 95.554                       |
| 24                  | 122.873                      | 24                  | 186.33                       |
| 25                  | 159.499                      | 25                  | 121.831                      |
| 26                  | 20.085                       | 26                  | 115.859                      |
| 27                  | 198.488                      | 27                  | 80.026                       |
| 28                  | 277.647                      | 28                  | 57.332                       |

|    |         |    |         |
|----|---------|----|---------|
| 29 | 115.784 | 29 | 58.527  |
| 30 | 218.573 | 30 | 106.304 |
| 31 | 347.353 | 31 | 268.745 |
| 32 | 62.618  | 32 | 163.636 |
| 33 | 282.372 | 33 | 140.942 |
| 34 | 81.522  | 34 | 267.551 |
| 35 | 353.261 | 35 | 273.523 |
| 36 | 129.962 | 36 | 261.578 |
| 37 | 120.51  | 37 | 74.054  |
| 38 | 49.622  | 38 | 142.136 |
| 39 | 49.622  | 39 | 193.496 |
| 40 | 126.418 | 40 | 228.135 |
| 41 | 245.747 | 41 | 118.248 |
| 42 | 80.34   | 42 | 105.109 |
| 43 | 203.214 | 43 | 90.776  |
| 44 | 25.992  | 44 | 137.359 |
| 45 | 89.792  | 45 | 88.387  |
| 46 | 99.244  | 46 | 90.776  |
| 47 | 132.325 | 47 | 64.499  |
| 48 | 73.251  | 48 | 155.275 |
| 49 | 60.255  | 49 | 111.081 |
| 50 | 269.376 | 50 | 52.555  |
| 51 | 53.166  | 51 | 171.997 |
| 52 | 250.473 | 52 | 144.525 |
| 53 | 72.07   | 53 | 156.469 |
| 54 | 67.344  | 54 | 112.276 |
| 55 | 25.992  | 55 | 66.888  |
| 56 | 75.614  | 56 | 412.076 |
| 57 | 94.518  | 57 | 102.72  |
| 58 | 20.085  | 58 | 175.58  |
| 59 | 258.743 | 59 | 80.026  |
| 60 | 254.017 | 60 | 197.08  |
| 61 | 183.129 | 61 | 139.747 |
| 62 | 163.043 | 62 | 83.61   |
| 63 | 21.267  | 63 | 293.828 |
| 64 | 215.028 | 64 | 66.888  |
| 65 | 77.977  | 65 | 53.749  |
| 66 | 107.514 | 66 | 82.415  |
| 67 | 20.085  | 67 | 123.025 |
| 68 | 496.219 | 68 | 74.054  |
| 69 | 115.784 | 69 | 113.47  |
| 70 | 216.21  | 70 | 75.249  |
| 71 | 44.896  | 71 | 152.886 |
| 72 | 256.38  | 72 | 101.526 |
| 73 | 180.766 | 73 | 130.192 |
| 74 | 41.352  | 74 | 115.859 |
| 75 | 35.444  | 75 | 75.249  |

|     |         |     |         |
|-----|---------|-----|---------|
| 76  | 33.081  | 76  | 83.61   |
| 77  | 158.318 | 77  | 157.664 |
| 78  | 171.314 | 78  | 300.994 |
| 79  | 392.25  | 79  | 130.192 |
| 80  | 439.509 | 80  | 78.832  |
| 81  | 129.962 | 81  | 273.523 |
| 82  | 356.805 | 82  | 187.524 |
| 83  | 167.769 | 83  | 66.888  |
| 84  | 219.754 | 84  | 145.719 |
| 85  | 115.784 | 85  | 64.499  |
| 86  | 205.577 | 86  | 236.496 |
| 87  | 103.97  | 87  | 58.527  |
| 88  | 79.159  | 88  | 154.08  |
| 89  | 626.181 | 89  | 273.523 |
| 90  | 284.735 | 90  | 263.967 |
| 91  | 210.302 | 91  | 140.942 |
| 92  | 79.159  | 92  | 222.163 |
| 93  | 30.718  | 93  | 243.662 |
| 94  | 179.584 | 94  | 170.802 |
| 95  | 73.251  | 95  | 57.332  |
| 96  | 771.503 | 96  | 192.302 |
| 97  | 102.788 | 97  | 66.888  |
| 98  | 98.062  | 98  | 132.581 |
| 99  | 255.198 | 99  | 52.555  |
| 100 | 242.202 | 100 | 114.665 |
| 101 | 70.888  | 101 | 125.414 |
| 102 | 310.728 | 102 | 142.136 |
| 103 | 237.476 | 103 | 224.551 |
| 104 | 522.212 | 104 | 171.997 |
| 105 | 29.537  | 105 | 151.692 |
| 106 | 144.14  | 106 | 157.664 |
| 107 | 237.476 | 107 | 71.665  |
| 108 | 210.302 | 108 | 125.414 |
| 109 | 261.106 | 109 | 179.163 |
| 110 | 139.414 | 110 | 210.218 |
| 111 | 313.091 | 111 | 174.386 |
| 112 | 386.342 | 112 | 279.495 |
| 113 | 120.51  | 113 | 187.524 |
| 114 | 127.599 | 114 | 166.025 |
| 115 | 269.376 | 115 | 151.692 |
| 116 | 792.769 | 116 | 291.439 |
| 117 | 70.888  | 117 | 83.61   |
| 118 | 99.244  | 118 | 142.136 |
| 119 | 79.159  | 119 | 183.941 |
| 120 | 151.229 | 120 | 97.943  |
| 121 | 178.403 | 121 | 132.581 |
| 122 | 92.155  | 122 | 63.304  |

|     |         |     |         |
|-----|---------|-----|---------|
| 123 | 83.885  | 123 | 211.413 |
| 124 | 151.229 | 124 | 102.72  |
| 125 | 28.355  | 125 | 90.776  |
| 126 | 197.306 | 126 | 136.164 |
| 127 | 304.82  | 127 | 206.635 |
| 128 | 232.75  | 128 | 174.386 |
| 129 | 73.251  | 129 | 223.357 |
| 130 | 47.259  | 130 | 87.193  |
| 131 | 191.399 | 131 | 198.274 |
| 132 | 959.357 | 132 | 65.693  |
| 133 | 38.989  | 133 | 121.831 |
| 134 | 198.488 | 134 | 94.359  |
| 135 | 161.862 | 135 | 236.496 |
| 136 | 134.688 | 136 | 65.693  |
| 137 | 257.561 | 137 | 131.386 |
| 138 | 46.078  | 138 | 75.249  |
| 139 | 459.594 | 139 | 80.026  |
| 140 | 203.214 | 140 | 96.748  |
| 141 | 298.913 | 141 | 367.882 |
| 142 | 502.127 | 142 | 126.609 |
| 143 | 31.9    | 143 | 93.165  |
| 144 | 25.992  | 144 | 146.914 |
| 145 | 373.346 | 145 | 139.747 |
| 146 | 262.287 | 146 | 51.36   |
| 147 | 342.628 | 147 | 205.441 |
| 148 | 177.221 | 148 | 189.913 |
| 149 | 57.892  | 149 | 118.248 |
| 150 | 43.715  | 150 | 144.525 |
| 151 | 112.24  | 151 | 242.468 |
| 152 | 92.155  | 152 | 200.663 |
| 153 | 186.673 | 153 | 205.441 |
| 154 | 111.059 | 154 | 75.249  |
| 155 | 57.892  | 155 | 426.409 |
| 156 | 463.138 | 156 | 72.86   |
| 157 | 109.877 | 157 | 53.749  |
| 158 | 75.614  | 158 | 90.776  |
| 159 | 121.692 | 159 | 96.748  |
| 160 | 31.9    | 160 | 185.135 |
| 161 | 30.718  | 161 | 76.443  |
| 162 | 180.766 | 162 | 101.526 |
| 163 | 127.599 | 163 | 300.994 |
| 164 | 171.314 | 164 | 181.552 |
| 165 | 773.866 | 165 | 185.135 |
| 166 | 96.881  | 166 | 320.105 |
| 167 | 224.48  | 167 | 51.36   |
| 168 | 157.136 | 168 | 157.664 |
| 169 | 218.573 | 169 | 60.916  |

|     |         |     |         |
|-----|---------|-----|---------|
| 170 | 411.153 | 170 | 414.464 |
| 171 | 570.652 | 171 | 62.11   |
| 172 | 109.877 | 172 | 603.183 |
| 173 | 81.522  | 173 | 69.276  |
| 174 | 109.877 | 174 | 96.748  |
| 175 | 160.681 | 175 | 156.469 |
| 176 | 250.473 | 176 | 310.55  |
| 177 | 314.272 | 177 | 293.828 |
| 178 | 160.681 | 178 | 219.774 |
| 179 | 89.792  | 179 | 168.414 |
| 180 | 107.514 | 180 | 240.079 |
| 181 | 199.669 | 181 | 88.387  |
| 182 | 141.777 | 182 | 345.188 |
| 183 | 101.607 | 183 | 295.022 |
| 184 | 196.125 | 184 | 275.911 |
| 185 | 75.614  | 185 | 69.276  |
| 186 | 105.151 | 186 | 474.186 |
| 187 | 268.195 | 187 | 311.744 |
| 188 | 306.002 | 188 | 59.721  |
| 189 | 303.639 | 189 | 105.109 |
| 190 | 219.754 | 190 | 291.439 |
| 191 | 56.711  | 191 | 50.166  |
| 192 | 28.355  | 192 | 64.499  |
| 193 | 75.614  | 193 | 113.47  |
| 194 | 101.607 | 194 | 137.359 |
| 195 | 35.444  | 195 | 95.554  |
| 196 | 46.078  | 196 | 654.543 |
| 197 | 80.34   | 197 | 617.516 |
| 198 | 53.166  | 198 | 181.552 |
| 199 | 176.04  | 199 | 388.187 |
| 200 | 81.522  | 200 | 660.515 |
| 201 | 210.302 | 201 | 74.054  |
| 202 | 242.202 | 202 | 157.664 |
| 203 | 131.144 | 203 | 78.832  |
| 204 | 83.885  | 204 | 168.414 |
| 205 | 21.267  | 205 | 140.942 |
| 206 | 31.9    | 206 | 82.415  |
| 207 | 57.892  | 207 | 505.241 |
| 208 | 100.425 | 208 | 154.08  |
| 209 | 152.41  | 209 | 97.943  |
| 210 | 427.694 | 210 | 229.329 |
| 211 | 307.183 | 211 | 255.606 |
| 212 | 67.344  | 212 | 78.832  |
| 213 | 113.422 | 213 | 65.693  |
| 214 | 35.444  | 214 | 361.91  |
| 215 | 81.522  | 215 | 134.97  |
| 216 | 31.9    | 216 | 167.219 |

|     |         |     |         |
|-----|---------|-----|---------|
| 217 | 128.781 | 217 | 59.721  |
| 218 | 211.484 | 218 | 357.132 |
| 219 | 196.125 | 219 | 226.94  |
| 220 | 237.476 | 220 | 434.77  |
| 221 | 127.599 | 221 | 75.249  |
| 222 | 128.781 | 222 | 103.915 |
| 223 | 190.217 | 223 | 260.384 |
| 224 | 68.526  | 224 | 300.994 |
| 225 | 20.085  | 225 | 296.217 |
| 226 | 254.017 | 226 | 83.61   |
| 227 | 60.255  | 227 | 231.718 |
| 228 | 194.943 | 228 | 176.774 |
| 229 | 43.715  | 229 | 96.748  |
| 230 | 191.399 | 230 | 154.08  |
| 231 | 124.055 | 231 | 506.435 |
| 232 | 119.329 | 232 | 83.61   |
| 233 | 33.081  | 233 | 58.527  |
| 234 | 183.129 | 234 | 145.719 |
| 235 | 75.614  | 235 | 85.998  |
| 236 | 477.316 | 236 | 220.968 |
| 237 | 111.059 | 237 | 272.328 |
| 238 | 198.488 | 238 | 64.499  |
| 239 | 46.078  | 239 | 64.499  |
| 240 | 129.962 | 240 | 542.268 |
| 241 | 133.507 | 241 | 112.276 |
| 242 | 93.336  | 242 | 131.386 |
| 243 | 124.055 | 243 | 296.217 |
| 244 | 210.302 | 244 | 88.387  |
| 245 | 238.658 | 245 | 161.247 |
| 246 | 105.151 | 246 | 72.86   |
| 247 | 57.892  | 247 | 77.637  |
| 248 | 119.329 | 248 | 130.192 |
| 249 | 93.336  | 249 | 102.72  |
| 250 | 111.059 | 250 | 180.358 |
| 251 | 47.259  | 251 | 88.387  |
| 252 | 41.352  | 252 | 363.104 |
| 253 | 702.977 | 253 | 157.664 |
| 254 | 163.043 | 254 | 72.86   |
| 255 | 300.095 | 255 | 137.359 |
| 256 | 150.047 | 256 | 118.248 |
| 257 | 187.854 | 257 | 170.802 |
| 258 | 23.629  | 258 | 154.08  |
| 259 | 43.715  | 259 | 57.332  |
| 260 | 119.329 | 260 | 83.61   |
| 261 | 88.611  | 261 | 198.274 |
| 262 | 216.21  | 262 | 131.386 |
| 263 | 105.151 | 263 | 96.748  |

|     |         |     |         |
|-----|---------|-----|---------|
| 264 | 25.992  | 264 | 89.582  |
| 265 | 138.233 | 265 | 63.304  |
| 266 | 173.677 | 266 | 232.912 |
| 267 | 146.503 | 267 | 164.83  |
| 268 | 497.401 | 268 | 83.61   |
| 269 | 173.677 | 269 | 402.52  |
| 270 | 90.974  | 270 | 154.08  |
| 271 | 106.333 | 271 | 69.276  |
| 272 | 95.699  | 272 | 120.637 |
| 273 | 55.529  | 273 | 57.332  |
| 274 | 259.924 | 274 | 50.166  |
| 275 | 73.251  | 275 | 91.97   |
| 276 | 36.626  | 276 | 137.359 |
| 277 | 111.059 | 277 | 209.024 |
| 278 | 207.94  | 278 | 210.218 |
| 279 | 85.066  | 279 | 179.163 |
| 280 | 379.253 | 280 | 95.554  |
| 281 | 125.236 | 281 | 68.082  |
| 282 | 20.085  | 282 | 80.026  |
| 283 | 31.9    | 283 | 63.304  |
| 284 | 150.047 | 284 | 285.467 |
| 285 | 35.444  | 285 | 231.718 |
| 286 | 328.45  | 286 | 449.103 |
| 287 | 140.595 | 287 | 101.526 |
| 288 | 479.679 | 288 | 88.387  |
| 289 | 157.136 | 289 | 66.888  |
| 290 | 41.352  | 290 | 443.131 |
| 291 | 80.34   | 291 | 163.636 |
| 292 | 154.773 | 292 | 152.886 |
| 293 | 194.943 | 293 | 87.193  |
| 294 | 300.095 | 294 | 126.609 |
| 295 | 142.958 | 295 | 136.164 |
| 296 | 194.943 | 296 | 89.582  |
| 297 | 333.176 | 297 | 326.077 |
| 298 | 72.07   | 298 | 58.527  |
| 299 | 118.147 | 299 | 289.05  |
| 300 | 134.688 | 300 | 103.915 |
| 301 | 150.047 | 301 | 114.665 |
| 302 | 238.658 | 302 | 211.413 |
| 303 | 151.229 | 303 | 185.135 |
| 304 | 61.437  | 304 | 106.304 |
| 305 | 62.618  | 305 | 52.555  |
| 306 | 122.873 | 306 | 161.247 |
| 307 | 210.302 | 307 | 71.665  |
| 308 | 61.437  | 308 | 310.55  |
| 309 | 73.251  | 309 | 484.935 |
| 310 | 271.739 | 310 | 76.443  |

|     |         |     |         |
|-----|---------|-----|---------|
| 311 | 80.34   | 311 | 194.691 |
| 312 | 57.892  | 312 | 211.413 |
| 313 | 318.998 | 313 | 155.275 |
| 314 | 85.066  | 314 | 217.385 |
| 315 | 372.164 | 315 | 209.024 |
| 316 | 284.735 | 316 | 132.581 |
| 317 | 53.166  | 317 | 77.637  |
| 318 | 75.614  | 318 | 194.691 |
| 319 | 350.898 | 319 | 125.414 |
| 320 | 213.847 | 320 | 360.715 |
| 321 | 146.503 | 321 | 207.829 |
| 322 | 134.688 | 322 | 60.916  |
| 323 | 47.259  | 323 | 561.378 |
| 324 | 173.677 | 324 | 113.47  |
| 325 | 205.577 | 325 | 277.106 |
| 326 | 79.159  | 326 | 414.464 |
| 327 | 173.677 | 327 | 89.582  |
| 328 | 134.688 | 328 | 59.721  |
| 329 | 20.085  | 329 | 142.136 |
| 330 | 125.236 | 330 | 277.106 |
| 331 | 331.994 | 331 | 148.108 |
| 332 | 207.94  | 332 | 59.721  |
| 333 | 76.796  | 333 | 114.665 |
| 334 | 61.437  | 334 | 51.36   |
| 335 | 131.144 | 335 | 57.332  |
| 336 | 153.592 | 336 | 324.883 |
| 337 | 387.524 | 337 | 223.357 |
| 338 | 186.673 | 338 | 68.082  |
| 339 | 262.287 | 339 | 226.94  |
| 340 | 57.892  | 340 | 117.053 |
| 341 | 139.414 | 341 | 168.414 |
| 342 | 73.251  | 342 | 535.101 |
| 343 | 75.614  | 343 | 95.554  |
| 344 | 211.484 | 344 | 66.888  |
| 345 | 224.48  | 345 | 209.024 |
| 346 | 37.807  | 346 | 95.554  |
| 347 | 140.595 | 347 | 157.664 |
| 348 | 141.777 | 348 | 303.383 |
| 349 | 365.076 | 349 | 106.304 |
| 350 | 96.881  | 350 | 89.582  |
| 351 | 81.522  | 351 | 385.798 |
| 352 | 62.618  | 352 | 70.471  |
| 353 | 99.244  | 353 | 88.387  |
| 354 | 289.461 | 354 | 150.497 |
| 355 | 209.121 | 355 | 177.969 |
| 356 | 124.055 | 356 | 130.192 |
| 357 | 55.529  | 357 | 183.941 |



|     |         |     |         |
|-----|---------|-----|---------|
| 358 | 118.147 | 358 | 103.915 |
| 359 | 178.403 | 359 | 136.164 |
| 360 | 60.255  | 360 | 349.966 |
| 361 | 199.669 | 361 | 80.026  |
| 362 | 160.681 | 362 | 272.328 |
| 363 | 366.257 | 363 | 71.665  |
| 364 | 297.732 | 364 | 99.137  |
| 365 | 268.195 | 365 | 246.051 |
| 366 | 115.784 | 366 | 230.523 |
| 367 | 79.159  | 367 | 174.386 |
| 368 | 316.635 | 368 | 243.662 |
| 369 | 82.703  | 369 | 114.665 |
| 370 | 35.444  | 370 | 176.774 |
| 371 | 692.344 | 371 | 173.191 |
| 372 | 161.862 | 372 | 102.72  |
| 373 | 53.166  | 373 | 111.081 |
| 374 | 27.174  | 374 | 89.582  |
| 375 | 243.384 | 375 | 166.025 |
| 376 | 206.758 | 376 | 140.942 |
| 377 | 126.418 | 377 | 315.327 |
| 378 | 96.881  | 378 | 64.499  |
| 379 | 92.155  | 379 | 326.077 |
| 380 | 20.085  | 380 | 137.359 |
| 381 | 44.896  | 381 | 146.914 |
| 382 | 33.081  | 382 | 212.607 |
| 383 | 277.647 | 383 | 54.943  |
| 384 | 20.085  | 384 | 271.134 |
| 385 | 301.276 | 385 | 187.524 |
| 386 | 119.329 | 386 | 175.58  |
| 387 | 189.036 | 387 | 51.36   |
| 388 | 103.97  | 388 | 120.637 |
| 389 | 131.144 | 389 | 320.105 |
| 390 | 82.703  | 390 | 63.304  |
| 391 | 731.333 | 391 | 143.331 |
| 392 | 59.074  | 392 | 283.078 |
| 393 | 150.047 | 393 | 309.355 |
| 394 | 309.546 | 394 | 80.026  |
| 395 | 101.607 | 395 | 120.637 |
| 396 | 59.074  | 396 | 57.332  |
| 397 | 599.008 | 397 | 66.888  |
| 398 | 44.896  | 398 | 126.609 |
| 399 | 646.267 | 399 | 138.553 |
| 400 | 42.533  | 400 | 71.665  |
| 401 | 228.025 | 401 | 229.329 |
| 402 | 413.516 | 402 | 507.629 |
| 403 | 300.095 | 403 | 58.527  |
| 404 | 119.329 | 404 | 176.774 |

|     |         |     |         |
|-----|---------|-----|---------|
| 405 | 289.461 | 405 | 64.499  |
| 406 | 238.658 | 406 | 71.665  |
| 407 | 173.677 | 407 | 253.217 |
| 408 | 101.607 | 408 | 272.328 |
| 409 | 22.448  | 409 | 280.689 |
| 410 | 63.8    | 410 | 69.276  |
| 411 | 83.885  | 411 | 63.304  |
| 412 | 72.07   | 412 | 70.471  |
| 413 | 24.811  | 413 | 51.36   |
| 414 | 107.514 | 414 | 389.382 |
| 415 | 111.059 | 415 | 139.747 |
| 416 | 278.828 | 416 | 57.332  |
| 417 | 151.229 | 417 | 51.36   |
| 418 | 64.981  | 418 | 561.378 |
| 419 | 23.629  | 419 | 317.716 |
| 420 | 327.268 | 420 | 340.41  |
| 421 | 165.406 | 421 | 333.244 |
| 422 | 77.977  | 422 | 235.301 |
| 423 | 237.476 | 423 | 119.442 |
| 424 | 38.989  | 424 | 119.442 |
| 425 | 37.807  | 425 | 57.332  |
| 426 | 152.41  | 426 | 62.11   |
| 427 | 255.198 | 427 | 89.582  |
| 428 | 108.696 | 428 | 214.996 |
| 429 | 122.873 | 429 | 56.138  |
| 430 | 170.132 | 430 | 143.331 |
| 431 | 131.144 | 431 | 130.192 |
| 432 | 174.858 | 432 | 53.749  |
| 433 | 174.858 | 433 | 186.33  |
| 434 | 133.507 | 434 | 310.55  |
| 435 | 42.533  | 435 | 111.081 |
| 436 | 103.97  | 436 | 283.078 |
| 437 | 184.31  | 437 | 186.33  |
| 438 | 35.444  | 438 | 138.553 |
| 439 | 98.062  | 439 | 76.443  |
| 440 | 128.781 | 440 | 125.414 |
| 441 | 83.885  | 441 | 52.555  |
| 442 | 121.692 | 442 | 531.518 |
| 443 | 131.144 | 443 | 287.856 |
| 444 | 342.628 | 444 | 237.69  |
| 445 | 479.679 | 445 | 85.998  |
| 446 | 22.448  | 446 | 108.692 |
| 447 | 231.569 | 447 | 246.051 |
| 448 | 277.647 | 448 | 93.165  |
| 449 | 185.491 | 449 | 52.555  |
| 450 | 50.803  | 450 | 268.745 |
| 451 | 51.985  | 451 | 232.912 |

|     |         |     |         |
|-----|---------|-----|---------|
| 452 | 135.87  | 452 | 125.414 |
| 453 | 25.992  | 453 | 192.302 |
| 454 | 262.287 | 454 | 70.471  |
| 455 | 173.677 | 455 | 268.745 |
| 456 | 159.499 | 456 | 252.023 |
| 457 | 370.983 | 457 | 155.275 |
| 458 | 57.892  | 458 | 57.332  |
| 459 | 921.55  | 459 | 59.721  |
| 460 | 401.701 | 460 | 744.125 |
| 461 | 144.14  | 461 | 217.385 |
| 462 | 61.437  | 462 | 158.858 |
| 463 | 145.321 | 463 | 111.081 |
| 464 | 95.699  | 464 | 107.498 |
| 465 | 47.259  | 465 | 93.165  |
| 466 | 134.688 | 466 | 223.357 |
| 467 | 75.614  | 467 | 275.911 |
| 468 | 27.174  | 468 | 174.386 |
| 469 | 108.696 | 469 | 136.164 |
| 470 | 168.951 | 470 | 255.606 |
| 471 | 129.962 | 471 | 161.247 |
| 472 | 180.766 | 472 | 115.859 |
| 473 | 64.981  | 473 | 123.025 |
| 474 | 115.784 | 474 | 164.83  |
| 475 | 151.229 | 475 | 246.051 |
| 476 | 180.766 | 476 | 114.665 |
| 477 | 101.607 | 477 | 90.776  |
| 478 | 241.021 | 478 | 91.97   |
| 479 | 114.603 | 479 | 103.915 |
| 480 | 144.14  | 480 | 88.387  |
| 481 | 142.958 | 481 | 265.162 |
| 482 | 92.155  | 482 | 99.137  |
| 483 | 43.715  | 483 | 87.193  |
| 484 | 79.159  | 484 | 63.304  |
| 485 | 69.707  | 485 | 163.636 |
| 486 | 115.784 | 486 | 146.914 |
| 487 | 235.113 | 487 | 197.08  |
| 488 | 111.059 | 488 | 56.138  |
| 489 | 140.595 | 489 | 62.11   |
| 490 | 140.595 | 490 | 126.609 |
| 491 | 414.698 | 491 | 81.221  |
| 492 | 125.236 | 492 | 214.996 |
| 493 | 311.909 | 493 | 106.304 |
| 494 | 119.329 | 494 | 289.05  |
| 495 | 51.985  | 495 | 203.052 |
| 496 | 186.673 | 496 | 105.109 |
| 497 | 196.125 | 497 | 132.581 |
| 498 | 47.259  | 498 | 93.165  |

|     |          |     |         |
|-----|----------|-----|---------|
| 499 | 131.144  | 499 | 182.747 |
| 500 | 124.055  | 500 | 189.913 |
| 501 | 212.665  | 501 | 94.359  |
| 502 | 115.784  | 502 | 84.804  |
| 503 | 99.244   | 503 | 50.166  |
| 504 | 158.318  | 504 | 56.138  |
| 505 | 2320.416 | 505 | 145.719 |
| 506 | 111.059  | 506 | 91.97   |
| 507 | 74.433   | 507 | 95.554  |
| 508 | 83.885   | 508 | 85.998  |
| 509 | 125.236  | 509 | 59.721  |
| 510 | 254.017  | 510 | 166.025 |
| 511 | 165.406  | 511 | 157.664 |
| 512 | 67.344   | 512 | 125.414 |
| 513 | 152.41   | 513 | 102.72  |
| 514 | 255.198  | 514 | 114.665 |
| 515 | 80.34    | 515 | 68.082  |
| 516 | 56.711   | 516 | 66.888  |
| 517 | 212.665  | 517 | 114.665 |
| 518 | 99.244   | 518 | 71.665  |
| 519 | 113.422  | 519 | 50.166  |
| 520 | 28.355   | 520 | 194.691 |
| 521 | 69.707   | 521 | 95.554  |
| 522 | 140.595  | 522 | 94.359  |
| 523 | 307.183  | 523 | 88.387  |
| 524 | 56.711   | 524 | 57.332  |
| 525 | 51.985   | 525 | 284.272 |
| 526 | 285.917  | 526 | 252.023 |
| 527 | 48.44    | 527 | 103.915 |
| 528 | 291.824  | 528 | 308.161 |
| 529 | 144.14   | 529 | 145.719 |
| 530 | 518.667  | 530 | 166.025 |
| 531 | 112.24   | 531 | 57.332  |
| 532 | 87.429   | 532 | 137.359 |
| 533 | 257.561  | 533 | 352.355 |
| 534 | 111.059  | 534 | 156.469 |
| 535 | 75.614   | 535 | 53.749  |
| 536 | 127.599  | 536 | 62.11   |
| 537 | 20.085   | 537 | 177.969 |
| 538 | 342.628  | 538 | 60.916  |
| 539 | 82.703   | 539 | 94.359  |
| 540 | 55.529   | 540 | 169.608 |
| 541 | 33.081   | 541 | 124.22  |
| 542 | 85.066   | 542 | 185.135 |
| 543 | 28.355   | 543 | 69.276  |
| 544 | 246.928  | 544 | 63.304  |
| 545 | 77.977   | 545 | 90.776  |

|     |         |     |         |
|-----|---------|-----|---------|
| 546 | 76.796  | 546 | 624.683 |
| 547 | 51.985  | 547 | 51.36   |
| 548 | 139.414 | 548 | 189.913 |
| 549 | 138.233 | 549 | 280.689 |
| 550 | 127.599 | 550 | 75.249  |
| 551 | 199.669 | 551 | 102.72  |
| 552 | 105.151 | 552 | 158.858 |
| 553 | 128.781 | 553 | 69.276  |
| 554 | 31.9    | 554 | 99.137  |
| 555 | 133.507 | 555 | 191.108 |
| 556 | 173.677 | 556 | 154.08  |
| 557 | 42.533  | 557 | 207.829 |
| 558 | 191.399 | 558 | 216.19  |
| 559 | 262.287 | 559 | 68.082  |
| 560 | 268.195 | 560 | 62.11   |
| 561 | 44.896  | 561 | 52.555  |
| 562 | 154.773 | 562 | 205.441 |
| 563 | 191.399 | 563 | 174.386 |
| 564 | 79.159  | 564 | 94.359  |
| 565 | 222.117 | 565 | 106.304 |
| 566 | 40.17   | 566 | 124.22  |
| 567 | 64.981  | 567 | 53.749  |
| 568 | 196.125 | 568 | 953.149 |
| 569 | 251.654 | 569 | 175.58  |
| 570 | 112.24  | 570 | 105.109 |
| 571 | 252.836 | 571 | 82.415  |
| 572 | 242.202 | 572 | 63.304  |
| 573 | 289.461 | 573 | 84.804  |
| 574 | 178.403 | 574 | 101.526 |
| 575 | 160.681 | 575 | 175.58  |
| 576 | 23.629  | 576 | 174.386 |
| 577 | 470.227 | 577 | 142.136 |
| 578 | 46.078  | 578 | 243.662 |
| 579 | 124.055 | 579 | 63.304  |
| 580 | 41.352  | 580 | 76.443  |
| 581 | 33.081  | 581 | 164.83  |
| 582 | 51.985  | 582 | 97.943  |
| 583 | 111.059 | 583 | 72.86   |
| 584 | 23.629  | 584 | 205.441 |
| 585 | 176.04  | 585 | 64.499  |
| 586 | 54.348  | 586 | 195.885 |
| 587 | 219.754 | 587 | 58.527  |
| 588 | 59.074  | 588 | 94.359  |
| 589 | 90.974  | 589 | 130.192 |
| 590 | 363.894 | 590 | 78.832  |
| 591 | 23.629  | 591 | 148.108 |
| 592 | 185.491 | 592 | 278.3   |

|     |         |     |         |
|-----|---------|-----|---------|
| 593 | 48.44   | 593 | 151.692 |
| 594 | 246.928 | 594 | 101.526 |
| 595 | 82.703  | 595 | 130.192 |
| 596 | 51.985  | 596 | 125.414 |
| 597 | 108.696 | 597 | 268.745 |
| 598 | 285.917 | 598 | 89.582  |
| 599 | 51.985  | 599 | 69.276  |
| 600 | 233.932 | 600 | 168.414 |
| 601 | 349.716 | 601 | 324.883 |
| 602 | 114.603 | 602 | 88.387  |
| 603 | 96.881  | 603 | 57.332  |
| 604 | 22.448  | 604 | 224.551 |
| 605 | 124.055 | 605 | 81.221  |
| 606 | 108.696 | 606 | 228.135 |
| 607 | 38.989  | 607 | 62.11   |
| 608 | 51.985  | 608 | 50.166  |
| 609 | 184.31  | 609 | 170.802 |
| 610 | 168.951 | 610 | 54.943  |
| 611 | 630.907 | 611 | 152.886 |
| 612 | 122.873 | 612 | 290.245 |
| 613 | 352.079 | 613 | 425.214 |
| 614 | 146.503 | 614 | 189.913 |
| 615 | 21.267  | 615 | 132.581 |
| 616 | 183.129 | 616 | 197.08  |
| 617 | 133.507 | 617 | 50.166  |
| 618 | 20.085  | 618 | 358.327 |
| 619 | 400.52  | 619 | 259.19  |
| 620 | 128.781 | 620 | 84.804  |
| 621 | 163.043 | 621 | 133.775 |
| 622 | 205.577 | 622 | 84.804  |
| 623 | 297.732 | 623 | 145.719 |
| 624 | 159.499 | 624 | 199.468 |
| 625 | 302.457 | 625 | 203.052 |
| 626 | 77.977  | 626 | 89.582  |
| 627 | 315.454 | 627 | 95.554  |
| 628 | 107.514 | 628 | 124.22  |
| 629 | 54.348  | 629 | 133.775 |
| 630 | 99.244  | 630 | 182.747 |
| 631 | 124.055 | 631 | 158.858 |
| 632 | 46.078  | 632 | 124.22  |
| 633 | 404.064 | 633 | 188.719 |
| 634 | 99.244  | 634 | 58.527  |
| 635 | 77.977  | 635 | 59.721  |
| 636 | 51.985  | 636 | 63.304  |
| 637 | 50.803  | 637 | 76.443  |
| 638 | 723.062 | 638 | 82.415  |
| 639 | 49.622  | 639 | 71.665  |

|     |         |     |         |
|-----|---------|-----|---------|
| 640 | 99.244  | 640 | 57.332  |
| 641 | 90.974  | 641 | 65.693  |
| 642 | 199.669 | 642 | 500.945 |
| 643 | 189.036 | 643 | 56.711  |
| 644 | 213.847 | 644 | 47.259  |
| 645 | 193.762 | 645 | 42.533  |
| 646 | 96.881  | 646 | 151.229 |
| 647 | 174.858 | 647 | 212.665 |
| 648 | 138.233 | 648 | 56.711  |
| 649 | 21.267  | 649 | 132.325 |
| 650 | 57.892  | 650 | 80.34   |
| 651 | 37.807  | 651 | 141.777 |
| 652 | 62.618  | 652 | 33.081  |
| 653 | 107.514 | 653 | 56.711  |
| 654 | 588.374 | 654 | 89.792  |
| 655 | 146.503 | 655 | 42.533  |
| 656 | 347.353 | 656 | 51.985  |
| 657 | 131.144 | 657 | 47.259  |
| 658 | 37.807  | 658 | 47.259  |
| 659 | 135.87  | 659 | 42.533  |
| 660 | 207.94  | 660 | 141.777 |
| 661 | 93.336  | 661 | 203.214 |
| 662 | 28.355  | 662 | 23.629  |
| 663 | 166.588 | 663 | 37.807  |
| 664 | 646.267 | 664 | 75.614  |
| 665 | 35.444  | 665 | 122.873 |
| 666 | 336.72  | 666 | 66.163  |
| 667 | 33.081  | 667 | 656.9   |
| 668 | 216.21  | 668 | 61.437  |
| 669 | 256.38  | 669 | 56.711  |
| 670 | 151.229 | 670 | 23.629  |
| 671 | 131.144 | 671 | 23.629  |
| 672 | 33.081  | 672 | 463.138 |
| 673 | 434.783 | 673 | 382.798 |
| 674 | 183.129 | 674 | 293.006 |
| 675 | 33.081  | 675 | 23.629  |
| 676 | 35.444  | 676 | 23.629  |
| 677 | 126.418 | 677 | 89.792  |
| 678 | 25.992  | 678 | 42.533  |
| 679 | 64.981  | 679 | 61.437  |
| 680 | 495.038 | 680 | 127.599 |
| 681 | 120.51  | 681 | 28.355  |
| 682 | 101.607 | 682 | 94.518  |
| 683 | 95.699  | 683 | 99.244  |
| 684 | 135.87  | 684 | 103.97  |
| 685 | 582.467 | 685 | 75.614  |
| 686 | 131.144 | 686 | 37.807  |

|     |         |     |          |
|-----|---------|-----|----------|
| 687 | 121.692 | 687 | 146.503  |
| 688 | 125.236 | 688 | 47.259   |
| 689 | 164.225 | 689 | 132.325  |
| 690 | 83.885  | 690 | 203.214  |
| 691 | 165.406 | 691 | 80.34    |
| 692 | 133.507 | 692 | 61.437   |
| 693 | 99.244  | 693 | 37.807   |
| 694 | 80.34   | 694 | 37.807   |
| 695 | 99.244  | 695 | 42.533   |
| 696 | 628.544 | 696 | 42.533   |
| 697 | 153.592 | 697 | 184.31   |
| 698 | 372.164 | 698 | 1086.957 |
| 699 | 29.537  | 699 | 37.807   |
| 700 | 199.669 | 700 | 33.081   |
| 701 | 144.14  | 701 | 23.629   |
| 702 | 44.896  | 702 | 56.711   |
| 703 | 118.147 | 703 | 165.406  |
| 704 | 287.098 | 704 | 47.259   |
| 705 | 308.365 | 705 | 42.533   |
| 706 | 21.267  | 706 | 108.696  |
| 707 | 478.497 | 707 | 37.807   |
| 708 | 122.873 | 708 | 33.081   |
| 709 | 206.758 | 709 | 23.629   |
| 710 | 34.263  | 710 | 89.792   |
| 711 | 379.253 | 711 | 146.503  |
| 712 | 59.074  | 712 | 66.163   |
| 713 | 29.537  | 713 | 85.066   |
| 714 | 114.603 | 714 | 47.259   |
| 715 | 124.055 | 715 | 122.873  |
| 716 | 193.762 | 716 | 23.629   |
| 717 | 354.442 | 717 | 37.807   |
| 718 | 316.635 | 718 | 401.701  |
| 719 | 47.259  | 719 | 28.355   |
| 720 | 180.766 | 720 | 28.355   |
| 721 | 222.117 | 721 | 37.807   |
| 722 | 53.166  | 722 | 56.711   |
| 723 | 186.673 | 723 | 189.036  |
| 724 | 105.151 | 724 | 122.873  |
| 725 | 174.858 | 725 | 344.991  |
| 726 | 172.495 | 726 | 94.518   |
| 727 | 88.611  | 727 | 37.807   |
| 728 | 114.603 | 728 | 396.975  |
| 729 | 108.696 | 729 | 42.533   |
| 730 | 47.259  | 730 | 311.909  |
| 731 | 92.155  | 731 | 66.163   |
| 732 | 105.151 | 732 | 118.147  |
| 733 | 118.147 | 733 | 37.807   |



|     |          |     |          |
|-----|----------|-----|----------|
| 734 | 29.537   | 734 | 160.681  |
| 735 | 20.085   | 735 | 37.807   |
| 736 | 1138.941 | 736 | 61.437   |
| 737 | 378.072  | 737 | 189.036  |
| 738 | 146.503  | 738 | 118.147  |
| 739 | 341.446  | 739 | 70.888   |
| 740 | 59.074   | 740 | 85.066   |
| 741 | 187.854  | 741 | 23.629   |
| 742 | 86.248   | 742 | 37.807   |
| 743 | 550.567  | 743 | 85.066   |
| 744 | 87.429   | 744 | 33.081   |
| 745 | 42.533   | 745 | 51.985   |
| 746 | 82.703   | 746 | 212.665  |
| 747 | 249.291  | 747 | 151.229  |
| 748 | 271.739  | 748 | 47.259   |
| 749 | 105.151  | 749 | 122.873  |
| 750 | 95.699   | 750 | 51.985   |
| 751 | 220.936  | 751 | 160.681  |
| 752 | 74.433   | 752 | 845.936  |
| 753 | 216.21   | 753 | 47.259   |
| 754 | 171.314  | 754 | 189.036  |
| 755 | 558.837  | 755 | 297.732  |
| 756 | 176.04   | 756 | 33.081   |
| 757 | 83.885   | 757 | 28.355   |
| 758 | 840.028  | 758 | 335.539  |
| 759 | 89.792   | 759 | 70.888   |
| 760 | 46.078   | 760 | 37.807   |
| 761 | 86.248   | 761 | 217.391  |
| 762 | 381.616  | 762 | 80.34    |
| 763 | 308.365  | 763 | 118.147  |
| 764 | 100.425  | 764 | 33.081   |
| 765 | 22.448   | 765 | 23.629   |
| 766 | 100.425  | 766 | 80.34    |
| 767 | 38.989   | 767 | 439.509  |
| 768 | 72.07    | 768 | 255.198  |
| 769 | 204.395  | 769 | 321.361  |
| 770 | 152.41   | 770 | 28.355   |
| 771 | 137.051  | 771 | 28.355   |
| 772 | 59.074   | 772 | 1460.302 |
| 773 | 64.981   | 773 | 70.888   |
| 774 | 24.811   | 774 | 415.879  |
| 775 | 215.028  | 775 | 51.985   |
| 776 | 163.043  | 776 | 160.681  |
| 777 | 38.989   | 777 | 56.711   |
| 778 | 206.758  | 778 | 37.807   |
| 779 | 181.947  | 779 | 85.066   |
| 780 | 105.151  | 780 | 411.153  |

|     |         |     |         |
|-----|---------|-----|---------|
| 781 | 38.989  | 781 | 155.955 |
| 782 | 1017.25 | 782 | 108.696 |
| 783 | 198.488 | 783 | 231.569 |
| 784 | 320.18  | 784 | 118.147 |
| 785 | 67.344  | 785 | 37.807  |
| 786 | 116.966 | 786 | 85.066  |
| 787 | 79.159  | 787 | 85.066  |
| 788 | 229.206 | 788 | 70.888  |
| 789 | 51.985  | 789 | 543.478 |
| 790 | 131.144 | 790 | 75.614  |
| 791 | 121.692 | 791 | 212.665 |
| 792 | 24.811  | 792 | 28.355  |
| 793 | 62.618  | 793 | 259.924 |
| 794 | 27.174  | 794 | 103.97  |
| 795 | 107.514 | 795 | 51.985  |
| 796 | 379.253 | 796 | 595.463 |
| 797 | 92.155  | 797 | 174.858 |
| 798 | 111.059 | 798 | 321.361 |
| 799 | 75.614  | 799 | 23.629  |
| 800 | 99.244  | 800 | 122.873 |
| 801 | 467.864 | 801 | 184.31  |
| 802 | 54.348  | 802 | 42.533  |
| 803 | 225.662 | 803 | 99.244  |
| 804 | 86.248  | 804 | 170.132 |
| 805 | 141.777 | 805 | 467.864 |
| 806 | 36.626  | 806 | 103.97  |
| 807 | 99.244  | 807 | 283.554 |
| 808 | 60.255  | 808 | 89.792  |
| 809 | 67.344  | 809 | 217.391 |
| 810 | 43.715  | 810 | 89.792  |
| 811 | 23.629  | 811 | 103.97  |
| 812 | 450.142 | 812 | 80.34   |
| 813 | 63.8    | 813 | 33.081  |
| 814 | 206.758 | 814 | 212.665 |
| 815 | 72.07   | 815 | 80.34   |
| 816 | 88.611  | 816 | 37.807  |
| 817 | 232.75  | 817 | 66.163  |
| 818 | 106.333 | 818 | 330.813 |
| 819 | 74.433  | 819 | 75.614  |
| 820 | 96.881  | 820 | 656.9   |
| 821 | 56.711  | 821 | 165.406 |
| 822 | 128.781 | 822 | 56.711  |
| 823 | 70.888  | 823 | 89.792  |
| 824 | 219.754 | 824 | 179.584 |
| 825 | 148.866 | 825 | 85.066  |
| 826 | 61.437  | 826 | 212.665 |
| 827 | 55.529  | 827 | 155.955 |

|     |         |     |          |
|-----|---------|-----|----------|
| 828 | 191.399 | 828 | 510.397  |
| 829 | 304.82  | 829 | 66.163   |
| 830 | 38.989  | 830 | 51.985   |
| 831 | 112.24  | 831 | 335.539  |
| 832 | 180.766 | 832 | 70.888   |
| 833 | 106.333 | 833 | 1205.104 |
| 834 | 190.217 | 834 | 165.406  |
| 835 | 209.121 | 835 | 340.265  |
| 836 | 60.255  | 836 | 245.747  |
| 837 | 153.592 | 837 | 89.792   |
| 838 | 64.981  | 838 | 113.422  |
| 839 | 72.07   | 839 | 241.021  |
| 840 | 204.395 | 840 | 146.503  |
| 841 | 756.144 | 841 | 85.066   |
| 842 | 241.021 | 842 | 127.599  |
| 843 | 378.072 | 843 | 23.629   |
| 844 | 404.064 | 844 | 311.909  |
| 845 | 121.692 | 845 | 146.503  |
| 846 | 326.087 | 846 | 89.792   |
| 847 | 563.563 | 847 | 964.083  |
| 848 | 79.159  | 848 | 151.229  |
| 849 | 114.603 | 849 | 28.355   |
| 850 | 355.624 | 850 | 37.807   |
| 851 | 291.824 | 851 | 141.777  |
| 852 | 218.573 | 852 | 160.681  |
| 853 | 100.425 | 853 | 80.34    |
| 854 | 124.055 | 854 | 212.665  |
| 855 | 37.807  | 855 | 307.183  |
| 856 | 205.577 | 856 | 33.081   |
| 857 | 107.514 | 857 | 37.807   |
| 858 | 59.074  | 858 | 160.681  |
| 859 | 59.074  | 859 | 297.732  |
| 860 | 63.8    | 860 | 297.732  |
| 861 | 43.715  | 861 | 354.442  |
| 862 | 171.314 | 862 | 132.325  |
| 863 | 126.418 | 863 | 28.355   |
| 864 | 94.518  | 864 | 118.147  |
| 865 | 157.136 | 865 | 42.533   |
| 866 | 28.355  | 866 | 61.437   |
| 867 | 62.618  | 867 | 61.437   |
| 868 | 226.843 | 868 | 85.066   |
| 869 | 29.537  | 869 | 302.457  |
| 870 | 166.588 | 870 | 193.762  |
| 871 | 98.062  | 871 | 56.711   |
| 872 | 146.503 | 872 | 33.081   |
| 873 | 285.917 | 873 | 174.858  |
| 874 | 83.885  | 874 | 61.437   |

|     |          |     |         |
|-----|----------|-----|---------|
| 875 | 183.129  | 875 | 70.888  |
| 876 | 60.255   | 876 | 23.629  |
| 877 | 259.924  | 877 | 420.605 |
| 878 | 1396.503 | 878 | 37.807  |
| 879 | 184.31   | 879 | 33.081  |
| 880 | 142.958  | 880 | 141.777 |
| 881 | 148.866  | 881 | 47.259  |
| 882 | 163.043  | 882 | 66.163  |
| 883 | 254.017  | 883 | 37.807  |
| 884 | 238.658  | 884 | 89.792  |
| 885 | 132.325  | 885 | 85.066  |
| 886 | 191.399  | 886 | 174.858 |
| 887 | 109.877  | 887 | 113.422 |
| 888 | 69.707   | 888 | 344.991 |
| 889 | 35.444   | 889 | 42.533  |
| 890 | 43.715   | 890 | 70.888  |
| 891 | 41.352   | 891 | 23.629  |
| 892 | 24.811   | 892 | 198.488 |
| 893 | 189.036  | 893 | 37.807  |
| 894 | 379.253  | 894 | 203.214 |
| 895 | 134.688  | 895 | 203.214 |
| 896 | 66.163   | 896 | 47.259  |
| 897 | 96.881   | 897 | 51.985  |
| 898 | 145.321  | 898 | 80.34   |
| 899 | 236.295  | 899 | 66.163  |
| 900 | 157.136  | 900 | 51.985  |
| 901 | 34.263   | 901 | 37.807  |
| 902 | 139.414  | 902 | 259.924 |
| 903 | 194.943  | 903 | 122.873 |
| 904 | 213.847  | 904 | 85.066  |
| 905 | 314.272  | 905 | 51.985  |
| 906 | 187.854  | 906 | 33.081  |
| 907 | 154.773  | 907 | 80.34   |
| 908 | 85.066   | 908 | 293.006 |
| 909 | 112.24   | 909 | 184.31  |
| 910 | 49.622   | 910 | 307.183 |
| 911 | 186.673  | 911 | 132.325 |
| 912 | 368.62   | 912 | 189.036 |
| 913 | 177.221  | 913 | 23.629  |
| 914 | 93.336   | 914 | 189.036 |
| 915 | 33.081   | 915 | 28.355  |
| 916 | 140.595  | 916 | 122.873 |
| 917 | 151.229  | 917 | 47.259  |
| 918 | 116.966  | 918 | 132.325 |
| 919 | 170.132  | 919 | 37.807  |
| 920 | 316.635  | 920 | 42.533  |
| 921 | 236.295  | 921 | 113.422 |

|     |         |     |         |
|-----|---------|-----|---------|
| 922 | 98.062  | 922 | 23.629  |
| 923 | 206.758 | 923 | 108.696 |
| 924 | 127.599 | 924 | 33.081  |
| 925 | 495.038 | 925 | 61.437  |
| 926 | 220.936 | 926 | 47.259  |
| 927 | 76.796  | 927 | 108.696 |
| 928 | 66.163  | 928 | 401.701 |
| 929 | 22.448  | 929 | 70.888  |
| 930 | 183.129 | 930 | 37.807  |
| 931 | 363.894 | 931 | 85.066  |
| 932 | 35.444  | 932 | 56.711  |
| 933 | 225.662 | 933 | 141.777 |
| 934 | 74.433  | 934 | 51.985  |
| 935 | 125.236 | 935 | 141.777 |
| 936 | 522.212 | 936 | 70.888  |
| 937 | 284.735 | 937 | 628.544 |
| 938 | 94.518  | 938 | 23.629  |
| 939 | 295.369 | 939 | 203.214 |
| 940 | 69.707  | 940 | 47.259  |
| 941 | 20.085  | 941 | 141.777 |
| 942 | 54.348  | 942 | 75.614  |
| 943 | 112.24  | 943 | 165.406 |
| 944 | 62.618  | 944 | 146.503 |
| 945 | 113.422 | 945 | 42.533  |
| 946 | 413.516 | 946 | 141.777 |
| 947 | 155.955 | 947 | 56.711  |
| 948 | 197.306 | 948 | 66.163  |
| 949 | 174.858 | 949 | 269.376 |
| 950 | 160.681 | 950 | 56.711  |
| 951 | 25.992  | 951 | 28.355  |
| 952 | 306.002 | 952 | 359.168 |
| 953 | 28.355  | 953 | 42.533  |
| 954 | 31.9    | 954 | 23.629  |
| 955 | 114.603 | 955 | 23.629  |
| 956 | 248.11  | 956 | 189.036 |
| 957 | 33.081  | 957 | 51.985  |
| 958 | 141.777 | 958 | 37.807  |
| 959 | 28.355  | 959 | 170.132 |
| 960 | 36.626  | 960 | 37.807  |
| 961 | 239.839 | 961 | 170.132 |
| 962 | 93.336  | 962 | 75.614  |
| 963 | 463.138 | 963 | 146.503 |
| 964 | 109.877 | 964 | 42.533  |
| 965 | 47.259  | 965 | 103.97  |
| 966 | 133.507 | 966 | 33.081  |
| 967 | 50.803  | 967 | 47.259  |
| 968 | 101.607 | 968 | 179.584 |

|      |         |      |         |
|------|---------|------|---------|
| 969  | 233.932 | 969  | 132.325 |
| 970  | 186.673 | 970  | 42.533  |
| 971  | 155.955 | 971  | 207.94  |
| 972  | 205.577 | 972  | 37.807  |
| 973  | 150.047 | 973  | 179.584 |
| 974  | 144.14  | 974  | 28.355  |
| 975  | 116.966 | 975  | 103.97  |
| 976  | 139.414 | 976  | 85.066  |
| 977  | 22.448  | 977  | 56.711  |
| 978  | 125.236 | 978  | 28.355  |
| 979  | 43.715  | 979  | 264.65  |
| 980  | 46.078  | 980  | 137.051 |
| 981  | 87.429  | 981  | 70.888  |
| 982  | 215.028 | 982  | 51.985  |
| 983  | 147.684 | 983  | 89.792  |
| 984  | 79.159  | 984  | 23.629  |
| 985  | 124.055 | 985  | 94.518  |
| 986  | 134.688 | 986  | 28.355  |
| 987  | 46.078  | 987  | 47.259  |
| 988  | 31.9    | 988  | 37.807  |
| 989  | 497.401 | 989  | 47.259  |
| 990  | 383.979 | 990  | 37.807  |
| 991  | 138.233 | 991  | 302.457 |
| 992  | 154.773 | 992  | 47.259  |
| 993  | 183.129 | 993  | 37.807  |
| 994  | 213.847 | 994  | 75.614  |
| 995  | 92.155  | 995  | 23.629  |
| 996  | 131.144 | 996  | 189.036 |
| 997  | 119.329 | 997  | 56.711  |
| 998  | 76.796  | 998  | 99.244  |
| 999  | 28.355  | 999  | 37.807  |
| 1000 | 621.456 | 1000 | 80.34   |
| 1001 | 28.355  | 1001 | 89.792  |
| 1002 | 34.263  | 1002 | 23.629  |
| 1003 | 765.595 | 1003 | 222.117 |
| 1004 | 114.603 | 1004 | 28.355  |
| 1005 | 128.781 | 1005 | 42.533  |
| 1006 | 433.601 | 1006 | 80.34   |
| 1007 | 48.44   | 1007 | 37.807  |
| 1008 | 484.405 | 1008 | 222.117 |
| 1009 | 35.444  | 1009 | 151.229 |
| 1010 | 179.584 | 1010 | 151.229 |
| 1011 | 144.14  | 1011 | 80.34   |
| 1012 | 277.647 | 1012 | 51.985  |
| 1013 | 73.251  | 1013 | 103.97  |
| 1014 | 120.51  | 1014 | 33.081  |
| 1015 | 170.132 | 1015 | 108.696 |

|      |         |      |         |
|------|---------|------|---------|
| 1016 | 90.974  | 1016 | 80.34   |
| 1017 | 157.136 | 1017 | 203.214 |
| 1018 | 353.261 | 1018 | 255.198 |
| 1019 | 51.985  | 1019 | 47.259  |
| 1020 | 148.866 | 1020 | 94.518  |
| 1021 | 30.718  | 1021 | 42.533  |
| 1022 | 830.577 | 1022 | 80.34   |
| 1023 | 152.41  | 1023 | 231.569 |
| 1024 | 258.743 | 1024 | 321.361 |
| 1025 | 549.386 | 1025 | 80.34   |
| 1026 | 142.958 | 1026 | 66.163  |
| 1027 | 27.174  | 1027 | 297.732 |
| 1028 | 203.214 | 1028 | 66.163  |
| 1029 | 125.236 | 1029 | 66.163  |
| 1030 | 36.626  | 1030 | 137.051 |
| 1031 | 200.851 | 1031 | 51.985  |
| 1032 | 190.217 | 1032 | 80.34   |
| 1033 | 183.129 | 1033 | 80.34   |
| 1034 | 191.399 | 1034 | 118.147 |
| 1035 | 140.595 | 1035 | 28.355  |
| 1036 | 96.881  | 1036 | 118.147 |
| 1037 | 101.607 | 1037 | 184.31  |
| 1038 | 114.603 | 1038 | 99.244  |
| 1039 | 122.873 | 1039 | 28.355  |
| 1040 | 515.123 | 1040 | 42.533  |
| 1041 | 80.34   | 1041 | 23.629  |
| 1042 | 114.603 | 1042 | 23.629  |
| 1043 | 31.9    | 1043 | 42.533  |
| 1044 | 75.614  | 1044 | 89.792  |
| 1045 | 86.248  | 1045 | 56.711  |
| 1046 | 62.618  | 1046 | 61.437  |
| 1047 | 418.242 | 1047 | 51.985  |
| 1048 | 72.07   | 1048 | 66.163  |
| 1049 | 38.989  | 1049 | 28.355  |
| 1050 | 22.448  | 1050 | 23.629  |
| 1051 | 85.066  | 1051 | 103.97  |
| 1052 | 28.355  | 1052 | 103.97  |
| 1053 | 440.69  | 1053 | 66.163  |
| 1054 | 44.896  | 1054 | 33.081  |
| 1055 | 21.267  | 1055 | 70.888  |
| 1056 | 317.817 | 1056 | 51.985  |
| 1057 | 275.284 | 1057 | 118.147 |
| 1058 | 94.518  | 1058 | 42.533  |
| 1059 | 81.522  | 1059 | 108.696 |
| 1060 | 193.762 | 1060 | 42.533  |
| 1061 | 64.981  | 1061 | 56.711  |
| 1062 | 101.607 | 1062 | 23.629  |

|      |         |      |         |
|------|---------|------|---------|
| 1063 | 171.314 | 1063 | 89.792  |
| 1064 | 211.484 | 1064 | 23.629  |
| 1065 | 95.699  | 1065 | 28.355  |
| 1066 | 197.306 | 1066 | 56.711  |
| 1067 | 204.395 | 1067 | 28.355  |
| 1068 | 331.994 | 1068 | 165.406 |
| 1069 | 96.881  | 1069 | 108.696 |
| 1070 | 327.268 | 1070 | 51.985  |
| 1071 | 219.754 | 1071 | 47.259  |
| 1072 | 49.622  | 1072 | 500.945 |
| 1073 | 267.013 | 1073 | 94.518  |
| 1074 | 69.707  | 1074 | 56.711  |
| 1075 | 118.147 | 1075 | 66.163  |
| 1076 | 22.448  | 1076 | 137.051 |
| 1077 | 82.703  | 1077 | 28.355  |
| 1078 | 50.803  | 1078 | 85.066  |
| 1079 | 251.654 | 1079 | 28.355  |
| 1080 | 134.688 | 1080 | 94.518  |
| 1081 | 73.251  | 1081 | 75.614  |
| 1082 | 40.17   | 1082 | 80.34   |
| 1083 | 267.013 | 1083 | 70.888  |
| 1084 | 69.707  | 1084 | 70.888  |
| 1085 | 167.769 | 1085 | 344.991 |
| 1086 | 53.166  | 1086 | 85.066  |
| 1087 | 61.437  | 1087 | 28.355  |
| 1088 | 116.966 | 1088 | 37.807  |
| 1089 | 46.078  | 1089 | 23.629  |
| 1090 | 80.34   | 1090 | 113.422 |
| 1091 | 111.059 | 1091 | 189.036 |
| 1092 | 28.355  | 1092 | 94.518  |
| 1093 | 155.955 | 1093 | 160.681 |
| 1094 | 79.159  | 1094 | 122.873 |
| 1095 | 72.07   | 1095 | 28.355  |
| 1096 | 50.803  | 1096 | 51.985  |
| 1097 | 69.707  | 1097 | 89.792  |
| 1098 | 126.418 | 1098 | 23.629  |
| 1099 | 229.206 | 1099 | 33.081  |
| 1100 | 89.792  | 1100 | 47.259  |
| 1101 | 20.085  | 1101 | 23.629  |
| 1102 | 82.703  | 1102 | 80.34   |
| 1103 | 135.87  | 1103 | 37.807  |
| 1104 | 532.845 | 1104 | 66.163  |
| 1105 | 213.847 | 1105 | 42.533  |
| 1106 | 40.17   | 1106 | 330.813 |
| 1107 | 228.025 | 1107 | 344.991 |
| 1108 | 44.896  | 1108 | 51.985  |
| 1109 | 164.225 | 1109 | 80.34   |



|      |         |      |         |
|------|---------|------|---------|
| 1110 | 204.395 | 1110 | 23.629  |
| 1111 | 96.881  | 1111 | 118.147 |
| 1112 | 121.692 | 1112 | 113.422 |
| 1113 | 55.529  | 1113 | 47.259  |
| 1114 | 313.091 | 1114 | 37.807  |
| 1115 | 55.529  | 1115 | 165.406 |
| 1116 | 55.529  | 1116 | 184.31  |
| 1117 | 90.974  | 1117 | 132.325 |
| 1118 | 190.217 | 1118 | 321.361 |
| 1119 | 135.87  | 1119 | 42.533  |
| 1120 | 142.958 | 1120 | 75.614  |
| 1121 | 106.333 | 1121 | 307.183 |
| 1122 | 41.352  | 1122 | 56.711  |
| 1123 | 493.856 | 1123 | 56.711  |
| 1124 | 254.017 | 1124 | 75.614  |
| 1125 | 119.329 | 1125 | 170.132 |
| 1126 | 241.021 | 1126 | 89.792  |
| 1127 | 24.811  | 1127 | 132.325 |
| 1128 | 25.992  | 1128 | 42.533  |
| 1129 | 276.465 | 1129 | 42.533  |
| 1130 | 132.325 | 1130 | 51.985  |
| 1131 | 290.643 | 1131 | 118.147 |
| 1132 | 73.251  | 1132 | 108.696 |
| 1133 | 30.718  | 1133 | 85.066  |
| 1134 | 50.803  | 1134 | 85.066  |
| 1135 | 75.614  | 1135 | 118.147 |
| 1136 | 224.48  | 1136 | 37.807  |
| 1137 | 148.866 | 1137 | 85.066  |
| 1138 | 177.221 | 1138 | 89.792  |
| 1139 | 138.233 | 1139 | 311.909 |
| 1140 | 217.391 | 1140 | 66.163  |
| 1141 | 205.577 | 1141 | 23.629  |
| 1142 | 98.062  | 1142 | 56.711  |
| 1143 | 50.803  | 1143 | 288.28  |
| 1144 | 82.703  | 1144 | 184.31  |
| 1145 | 113.422 | 1145 | 189.036 |
| 1146 | 131.144 | 1146 | 28.355  |
| 1147 | 41.352  | 1147 | 47.259  |
| 1148 | 33.081  | 1148 | 85.066  |
| 1149 | 198.488 | 1149 | 103.97  |
| 1150 | 230.388 | 1150 | 33.081  |
| 1151 | 37.807  | 1151 | 155.955 |
| 1152 | 315.454 | 1152 | 141.777 |
| 1153 | 29.537  | 1153 | 118.147 |
| 1154 | 125.236 | 1154 | 56.711  |
| 1155 | 183.129 | 1155 | 155.955 |
| 1156 | 121.692 | 1156 | 80.34   |

|      |         |      |          |
|------|---------|------|----------|
| 1157 | 49.622  | 1157 | 80.34    |
| 1158 | 243.384 | 1158 | 118.147  |
| 1159 | 203.214 | 1159 | 23.629   |
| 1160 | 51.985  | 1160 | 61.437   |
| 1161 | 140.595 | 1161 | 37.807   |
| 1162 | 80.34   | 1162 | 189.036  |
| 1163 | 24.811  | 1163 | 155.955  |
| 1164 | 284.735 | 1164 | 51.985   |
| 1165 | 128.781 | 1165 | 307.183  |
| 1166 | 107.514 | 1166 | 28.355   |
| 1167 | 38.989  | 1167 | 80.34    |
| 1168 | 153.592 | 1168 | 297.732  |
| 1169 | 95.699  | 1169 | 47.259   |
| 1170 | 38.989  | 1170 | 33.081   |
| 1171 | 108.696 | 1171 | 37.807   |
| 1172 | 98.062  | 1172 | 28.355   |
| 1173 | 224.48  | 1173 | 28.355   |
| 1174 | 70.888  | 1174 | 42.533   |
| 1175 | 310.728 | 1175 | 411.153  |
| 1176 | 118.147 | 1176 | 85.066   |
| 1177 | 186.673 | 1177 | 75.614   |
| 1178 | 63.8    | 1178 | 75.614   |
| 1179 | 131.144 | 1179 | 66.163   |
| 1180 | 27.174  | 1180 | 47.259   |
| 1181 | 276.465 | 1181 | 137.051  |
| 1182 | 141.777 | 1182 | 165.406  |
| 1183 | 87.429  | 1183 | 23.629   |
| 1184 | 144.14  | 1184 | 28.355   |
| 1185 | 168.951 | 1185 | 406.427  |
| 1186 | 47.259  | 1186 | 23.629   |
| 1187 | 200.851 | 1187 | 47.259   |
| 1188 | 22.448  | 1188 | 28.355   |
| 1189 | 137.051 | 1189 | 94.518   |
| 1190 | 186.673 | 1190 | 33.081   |
| 1191 | 34.263  | 1191 | 103.97   |
| 1192 | 281.191 | 1192 | 47.259   |
| 1193 | 192.58  | 1193 | 1039.698 |
| 1194 | 125.236 | 1194 | 47.259   |
| 1195 | 196.125 | 1195 | 85.066   |
| 1196 | 215.028 | 1196 | 23.629   |
| 1197 | 171.314 | 1197 | 28.355   |
| 1198 | 35.444  | 1198 | 108.696  |
| 1199 | 187.854 | 1199 | 80.34    |
| 1200 | 51.985  | 1200 | 23.629   |
| 1201 | 615.548 | 1201 | 127.599  |
| 1202 | 308.365 | 1202 | 42.533   |
| 1203 | 144.14  | 1203 | 103.97   |

|      |         |      |         |
|------|---------|------|---------|
| 1204 | 63.8    | 1204 | 42.533  |
| 1205 | 165.406 | 1205 | 33.081  |
| 1206 | 35.444  | 1206 | 85.066  |
| 1207 | 165.406 | 1207 | 75.614  |
| 1208 | 128.781 | 1208 | 23.629  |
| 1209 | 211.484 | 1209 | 28.355  |
| 1210 | 307.183 | 1210 | 118.147 |
| 1211 | 173.677 | 1211 | 23.629  |
| 1212 | 40.17   | 1212 | 85.066  |
| 1213 | 142.958 | 1213 | 85.066  |
| 1214 | 56.711  | 1214 | 23.629  |
| 1215 | 102.788 | 1215 | 28.355  |
| 1216 | 498.582 | 1216 | 108.696 |
| 1217 | 131.144 | 1217 | 326.087 |
| 1218 | 86.248  | 1218 | 37.807  |
| 1219 | 125.236 | 1219 | 132.325 |
| 1220 | 210.302 | 1220 | 89.792  |
| 1221 | 42.533  | 1221 | 99.244  |
| 1222 | 107.514 | 1222 | 42.533  |
| 1223 | 424.149 | 1223 | 458.412 |
| 1224 | 60.255  | 1224 | 302.457 |
| 1225 | 24.811  | 1225 | 33.081  |
| 1226 | 111.059 | 1226 | 85.066  |
| 1227 | 93.336  | 1227 | 37.807  |
| 1228 | 239.839 | 1228 | 250.473 |
| 1229 | 159.499 | 1229 | 61.437  |
| 1230 | 152.41  | 1230 | 94.518  |
| 1231 | 61.437  | 1231 | 61.437  |
| 1232 | 102.788 | 1232 | 203.214 |
| 1233 | 27.174  | 1233 | 108.696 |
| 1234 | 86.248  | 1234 | 89.792  |
| 1235 | 246.928 | 1235 | 75.614  |
| 1236 | 172.495 | 1236 | 56.711  |
| 1237 | 108.696 | 1237 | 56.711  |
| 1238 | 85.066  | 1238 | 103.97  |
| 1239 | 99.244  | 1239 | 103.97  |
| 1240 | 179.584 | 1240 | 56.711  |
| 1241 | 316.635 | 1241 | 137.051 |
| 1242 | 176.04  | 1242 | 108.696 |
| 1243 | 376.89  | 1243 | 75.614  |
| 1244 | 49.622  | 1244 | 23.629  |
| 1245 | 63.8    | 1245 | 146.503 |
| 1246 | 53.166  | 1246 | 37.807  |
| 1247 | 90.974  | 1247 | 28.355  |
| 1248 | 126.418 | 1248 | 56.711  |
| 1249 | 118.147 | 1249 | 56.711  |
| 1250 | 66.163  | 1250 | 85.066  |

|      |         |      |         |
|------|---------|------|---------|
| 1251 | 95.699  | 1251 | 118.147 |
| 1252 | 153.592 | 1252 | 42.533  |
| 1253 | 161.862 | 1253 | 567.108 |
| 1254 | 217.391 | 1254 | 99.244  |
| 1255 | 20.085  | 1255 | 33.081  |
| 1256 | 38.989  | 1256 | 80.34   |
| 1257 | 249.291 | 1257 | 42.533  |
| 1258 | 308.365 | 1258 | 189.036 |
| 1259 | 112.24  | 1259 | 103.97  |
| 1260 | 76.796  | 1260 | 23.629  |
| 1261 | 357.987 | 1261 | 132.325 |
| 1262 | 100.425 | 1262 | 70.888  |
| 1263 | 102.788 | 1263 | 75.614  |
| 1264 | 86.248  | 1264 | 99.244  |
| 1265 | 108.696 | 1265 | 75.614  |
| 1266 | 425.331 | 1266 | 47.259  |
| 1267 | 127.599 | 1267 | 127.599 |
| 1268 | 262.287 | 1268 | 80.34   |
| 1269 | 85.066  | 1269 | 47.259  |
| 1270 | 96.881  | 1270 | 118.147 |
| 1271 | 94.518  | 1271 | 170.132 |
| 1272 | 77.977  | 1272 | 61.437  |
| 1273 | 106.333 | 1273 | 80.34   |
| 1274 | 148.866 | 1274 | 118.147 |
| 1275 | 192.58  | 1275 | 56.711  |
| 1276 | 160.681 | 1276 | 189.036 |
| 1277 | 47.259  | 1277 | 47.259  |
| 1278 | 42.533  | 1278 | 47.259  |
| 1279 | 167.769 | 1279 | 23.629  |
| 1280 | 161.862 | 1280 | 70.888  |
| 1281 | 75.614  | 1281 | 23.629  |
| 1282 | 61.437  | 1282 | 70.888  |
| 1283 | 87.429  | 1283 | 75.614  |
| 1284 | 33.081  | 1284 | 99.244  |
| 1285 | 93.336  | 1285 | 28.355  |
| 1286 | 35.444  | 1286 | 33.081  |
| 1287 | 246.928 | 1287 | 56.711  |
| 1288 | 95.699  | 1288 | 51.985  |
| 1289 | 57.892  | 1289 | 33.081  |
| 1290 | 34.263  | 1290 | 99.244  |
| 1291 | 219.754 | 1291 | 118.147 |
| 1292 | 95.699  | 1292 | 113.422 |
| 1293 | 132.325 | 1293 | 66.163  |
| 1294 | 22.448  | 1294 | 66.163  |
| 1295 | 331.994 | 1295 | 37.807  |
| 1296 | 289.461 | 1296 | 61.437  |
| 1297 | 165.406 | 1297 | 28.355  |

|      |          |      |         |
|------|----------|------|---------|
| 1298 | 34.263   | 1298 | 33.081  |
| 1299 | 70.888   | 1299 | 70.888  |
| 1300 | 114.603  | 1300 | 28.355  |
| 1301 | 304.82   | 1301 | 155.955 |
| 1302 | 167.769  | 1302 | 33.081  |
| 1303 | 95.699   | 1303 | 28.355  |
| 1304 | 119.329  |      |         |
| 1305 | 189.036  |      |         |
| 1306 | 33.081   |      |         |
| 1307 | 181.947  |      |         |
| 1308 | 51.985   |      |         |
| 1309 | 164.225  |      |         |
| 1310 | 118.147  |      |         |
| 1311 | 40.17    |      |         |
| 1312 | 73.251   |      |         |
| 1313 | 64.981   |      |         |
| 1314 | 142.958  |      |         |
| 1315 | 135.87   |      |         |
| 1316 | 165.406  |      |         |
| 1317 | 207.94   |      |         |
| 1318 | 309.546  |      |         |
| 1319 | 95.699   |      |         |
| 1320 | 244.565  |      |         |
| 1321 | 116.966  |      |         |
| 1322 | 246.928  |      |         |
| 1323 | 98.062   |      |         |
| 1324 | 274.102  |      |         |
| 1325 | 168.951  |      |         |
| 1326 | 145.321  |      |         |
| 1327 | 779.773  |      |         |
| 1328 | 94.518   |      |         |
| 1329 | 181.947  |      |         |
| 1330 | 197.306  |      |         |
| 1331 | 288.28   |      |         |
| 1332 | 459.594  |      |         |
| 1333 | 60.255   |      |         |
| 1334 | 186.673  |      |         |
| 1335 | 50.803   |      |         |
| 1336 | 127.599  |      |         |
| 1337 | 51.985   |      |         |
| 1338 | 155.955  |      |         |
| 1339 | 1011.342 |      |         |
| 1340 | 150.047  |      |         |
| 1341 | 270.558  |      |         |
| 1342 | 151.229  |      |         |
| 1343 | 100.425  |      |         |
| 1344 | 146.503  |      |         |

|      |         |
|------|---------|
| 1345 | 301.276 |
| 1346 | 49.622  |
| 1347 | 35.444  |
| 1348 | 138.233 |
| 1349 | 72.07   |
| 1350 | 209.121 |
| 1351 | 89.792  |
| 1352 | 734.877 |
| 1353 | 95.699  |
| 1354 | 29.537  |
| 1355 | 62.618  |
| 1356 | 112.24  |
| 1357 | 28.355  |
| 1358 | 259.924 |
| 1359 | 146.503 |
| 1360 | 192.58  |
| 1361 | 295.369 |
| 1362 | 102.788 |
| 1363 | 200.851 |
| 1364 | 337.902 |
| 1365 | 192.58  |
| 1366 | 51.985  |
| 1367 | 68.526  |
| 1368 | 62.618  |
| 1369 | 40.17   |
| 1370 | 294.187 |
| 1371 | 302.457 |
| 1372 | 131.144 |
| 1373 | 194.943 |
| 1374 | 184.31  |
| 1375 | 225.662 |
| 1376 | 316.635 |
| 1377 | 41.352  |
| 1378 | 137.051 |
| 1379 | 193.762 |
| 1380 | 139.414 |
| 1381 | 233.932 |
| 1382 | 111.059 |
| 1383 | 30.718  |
| 1384 | 37.807  |
| 1385 | 94.518  |
| 1386 | 148.866 |
| 1387 | 106.333 |
| 1388 | 44.896  |
| 1389 | 146.503 |
| 1390 | 131.144 |
| 1391 | 131.144 |

|      |         |
|------|---------|
| 1392 | 145.321 |
| 1393 | 105.151 |
| 1394 | 158.318 |
| 1395 | 35.444  |
| 1396 | 192.58  |
| 1397 | 190.217 |
| 1398 | 166.588 |
| 1399 | 215.028 |
| 1400 | 204.395 |
| 1401 | 142.958 |
| 1402 | 114.603 |
| 1403 | 166.588 |
| 1404 | 132.325 |
| 1405 | 129.962 |
| 1406 | 147.684 |
| 1407 | 203.214 |
| 1408 | 83.885  |
| 1409 | 29.537  |
| 1410 | 95.699  |
| 1411 | 297.732 |
| 1412 | 154.773 |
| 1413 | 200.851 |
| 1414 | 168.951 |
| 1415 | 68.526  |
| 1416 | 55.529  |
| 1417 | 24.811  |
| 1418 | 99.244  |
| 1419 | 232.75  |
| 1420 | 37.807  |
| 1421 | 100.425 |
| 1422 | 178.403 |
| 1423 | 154.773 |
| 1424 | 51.985  |
| 1425 | 31.9    |
| 1426 | 42.533  |
| 1427 | 107.514 |
| 1428 | 40.17   |
| 1429 | 129.962 |
| 1430 | 36.626  |
| 1431 | 129.962 |
| 1432 | 376.89  |
| 1433 | 203.214 |
| 1434 | 280.009 |
| 1435 | 522.212 |
| 1436 | 263.469 |
| 1437 | 42.533  |
| 1438 | 311.909 |

|      |         |
|------|---------|
| 1439 | 166.588 |
| 1440 | 51.985  |
| 1441 | 144.14  |
| 1442 | 107.514 |
| 1443 | 92.155  |
| 1444 | 237.476 |
| 1445 | 151.229 |
| 1446 | 86.248  |
| 1447 | 158.318 |
| 1448 | 209.121 |
| 1449 | 99.244  |
| 1450 | 212.665 |
| 1451 | 145.321 |
| 1452 | 243.384 |
| 1453 | 66.163  |
| 1454 | 51.985  |
| 1455 | 21.267  |
| 1456 | 287.098 |
| 1457 | 20.085  |
| 1458 | 151.229 |
| 1459 | 25.992  |
| 1460 | 159.499 |
| 1461 | 20.085  |
| 1462 | 361.531 |
| 1463 | 115.784 |
| 1464 | 102.788 |
| 1465 | 47.259  |
| 1466 | 141.777 |
| 1467 | 210.302 |
| 1468 | 21.267  |
| 1469 | 185.491 |
| 1470 | 37.807  |
| 1471 | 36.626  |
| 1472 | 272.921 |
| 1473 | 49.622  |
| 1474 | 68.526  |
| 1475 | 53.166  |
| 1476 | 173.677 |
| 1477 | 95.699  |
| 1478 | 31.9    |
| 1479 | 94.518  |
| 1480 | 38.989  |
| 1481 | 51.985  |
| 1482 | 96.881  |
| 1483 | 76.796  |
| 1484 | 220.936 |
| 1485 | 151.229 |



|      |         |
|------|---------|
| 1486 | 186.673 |
| 1487 | 21.267  |
| 1488 | 64.981  |
| 1489 | 246.928 |
| 1490 | 116.966 |
| 1491 | 142.958 |
| 1492 | 121.692 |
| 1493 | 127.599 |
| 1494 | 107.514 |
| 1495 | 168.951 |
| 1496 | 303.639 |
| 1497 | 152.41  |
| 1498 | 148.866 |
| 1499 | 177.221 |
| 1500 | 125.236 |
| 1501 | 102.788 |
| 1502 | 73.251  |
| 1503 | 56.711  |
| 1504 | 108.696 |
| 1505 | 94.518  |
| 1506 | 102.788 |
| 1507 | 60.255  |
| 1508 | 98.062  |
| 1509 | 177.221 |
| 1510 | 131.144 |
| 1511 | 67.344  |
| 1512 | 177.221 |
| 1513 | 69.707  |
| 1514 | 33.081  |
| 1515 | 313.091 |
| 1516 | 108.696 |
| 1517 | 139.414 |
| 1518 | 170.132 |
| 1519 | 67.344  |
| 1520 | 44.896  |
| 1521 | 25.992  |
| 1522 | 59.074  |
| 1523 | 121.692 |
| 1524 | 125.236 |
| 1525 | 128.781 |
| 1526 | 99.244  |
| 1527 | 94.518  |
| 1528 | 48.44   |
| 1529 | 34.263  |
| 1530 | 21.267  |
| 1531 | 33.081  |
| 1532 | 54.348  |

|      |          |
|------|----------|
| 1533 | 38.989   |
| 1534 | 373.346  |
| 1535 | 108.696  |
| 1536 | 144.14   |
| 1537 | 236.295  |
| 1538 | 383.979  |
| 1539 | 573.015  |
| 1540 | 54.348   |
| 1541 | 85.066   |
| 1542 | 190.217  |
| 1543 | 324.905  |
| 1544 | 142.958  |
| 1545 | 209.121  |
| 1546 | 107.514  |
| 1547 | 67.344   |
| 1548 | 302.457  |
| 1549 | 101.607  |
| 1550 | 348.535  |
| 1551 | 95.699   |
| 1552 | 129.962  |
| 1553 | 145.321  |
| 1554 | 148.866  |
| 1555 | 82.703   |
| 1556 | 142.958  |
| 1557 | 164.225  |
| 1558 | 125.236  |
| 1559 | 79.159   |
| 1560 | 1656.427 |
| 1561 | 145.321  |
| 1562 | 141.777  |
| 1563 | 788.043  |
| 1564 | 50.803   |
| 1565 | 34.263   |
| 1566 | 103.97   |
| 1567 | 135.87   |
| 1568 | 60.255   |
| 1569 | 587.193  |
| 1570 | 50.803   |
| 1571 | 38.989   |
| 1572 | 25.992   |
| 1573 | 155.955  |
| 1574 | 340.265  |
| 1575 | 88.611   |
| 1576 | 142.958  |
| 1577 | 135.87   |
| 1578 | 48.44    |
| 1579 | 113.422  |

|      |         |
|------|---------|
| 1580 | 218.573 |
| 1581 | 237.476 |
| 1582 | 108.696 |
| 1583 | 202.032 |
| 1584 | 133.507 |
| 1585 | 85.066  |
| 1586 | 41.352  |
| 1587 | 35.444  |
| 1588 | 37.807  |
| 1589 | 59.074  |
| 1590 | 251.654 |
| 1591 | 73.251  |
| 1592 | 87.429  |
| 1593 | 101.607 |
| 1594 | 24.811  |
| 1595 | 113.422 |
| 1596 | 112.24  |
| 1597 | 94.518  |
| 1598 | 170.132 |
| 1599 | 139.414 |
| 1600 | 77.977  |
| 1601 | 68.526  |
| 1602 | 102.788 |
| 1603 | 60.255  |
| 1604 | 252.836 |
| 1605 | 23.629  |
| 1606 | 27.174  |
| 1607 | 197.306 |
| 1608 | 74.433  |
| 1609 | 89.792  |
| 1610 | 170.132 |
| 1611 | 258.743 |
| 1612 | 225.662 |
| 1613 | 56.711  |
| 1614 | 684.074 |
| 1615 | 66.163  |
| 1616 | 306.002 |
| 1617 | 27.174  |
| 1618 | 72.07   |
| 1619 | 131.144 |
| 1620 | 189.036 |
| 1621 | 147.684 |
| 1622 | 63.8    |
| 1623 | 257.561 |
| 1624 | 478.497 |
| 1625 | 126.418 |
| 1626 | 177.221 |

|      |          |
|------|----------|
| 1627 | 129.962  |
| 1628 | 55.529   |
| 1629 | 295.369  |
| 1630 | 257.561  |
| 1631 | 835.302  |
| 1632 | 23.629   |
| 1633 | 111.059  |
| 1634 | 176.04   |
| 1635 | 280.009  |
| 1636 | 79.159   |
| 1637 | 121.692  |
| 1638 | 92.155   |
| 1639 | 90.974   |
| 1640 | 81.522   |
| 1641 | 113.422  |
| 1642 | 49.622   |
| 1643 | 79.159   |
| 1644 | 157.136  |
| 1645 | 173.677  |
| 1646 | 61.437   |
| 1647 | 94.518   |
| 1648 | 27.174   |
| 1649 | 62.618   |
| 1650 | 72.07    |
| 1651 | 103.97   |
| 1652 | 62.618   |
| 1653 | 177.221  |
| 1654 | 98.062   |
| 1655 | 283.554  |
| 1656 | 145.321  |
| 1657 | 151.229  |
| 1658 | 1012.524 |
| 1659 | 150.047  |
| 1660 | 44.896   |
| 1661 | 315.454  |
| 1662 | 378.072  |
| 1663 | 168.951  |
| 1664 | 30.718   |
| 1665 | 137.051  |
| 1666 | 211.484  |
| 1667 | 68.526   |
| 1668 | 111.059  |
| 1669 | 21.267   |
| 1670 | 77.977   |
| 1671 | 73.251   |
| 1672 | 138.233  |
| 1673 | 430.057  |

|      |         |
|------|---------|
| 1674 | 87.429  |
| 1675 | 20.085  |
| 1676 | 161.862 |
| 1677 | 276.465 |
| 1678 | 218.573 |
| 1679 | 172.495 |
| 1680 | 31.9    |
| 1681 | 216.21  |
| 1682 | 61.437  |
| 1683 | 244.565 |
| 1684 | 172.495 |
| 1685 | 59.074  |
| 1686 | 60.255  |
| 1687 | 192.58  |
| 1688 | 322.543 |
| 1689 | 31.9    |
| 1690 | 42.533  |
| 1691 | 288.28  |
| 1692 | 42.533  |
| 1693 | 67.344  |
| 1694 | 330.813 |
| 1695 | 95.699  |
| 1696 | 131.144 |
| 1697 | 126.418 |
| 1698 | 61.437  |
| 1699 | 395.794 |
| 1700 | 61.437  |
| 1701 | 50.803  |
| 1702 | 289.461 |
| 1703 | 20.085  |
| 1704 | 392.25  |
| 1705 | 28.355  |
| 1706 | 33.081  |
| 1707 | 134.688 |
| 1708 | 66.163  |
| 1709 | 537.571 |
| 1710 | 134.688 |
| 1711 | 453.686 |
| 1712 | 753.781 |
| 1713 | 217.391 |
| 1714 | 571.834 |
| 1715 | 42.533  |
| 1716 | 129.962 |
| 1717 | 259.924 |
| 1718 | 452.505 |
| 1719 | 194.943 |
| 1720 | 124.055 |

|      |         |
|------|---------|
| 1721 | 82.703  |
| 1722 | 313.091 |
| 1723 | 37.807  |
| 1724 | 90.974  |
| 1725 | 87.429  |
| 1726 | 109.877 |
| 1727 | 789.225 |
| 1728 | 274.102 |
| 1729 | 211.484 |
| 1730 | 613.185 |
| 1731 | 109.877 |
| 1732 | 170.132 |
| 1733 | 69.707  |
| 1734 | 168.951 |
| 1735 | 129.962 |
| 1736 | 54.348  |
| 1737 | 72.07   |
| 1738 | 50.803  |
| 1739 | 83.885  |
| 1740 | 22.448  |
| 1741 | 36.626  |
| 1742 | 310.728 |
| 1743 | 59.074  |
| 1744 | 152.41  |
| 1745 | 140.595 |
| 1746 | 218.573 |
| 1747 | 22.448  |
| 1748 | 35.444  |
| 1749 | 51.985  |
| 1750 | 60.255  |
| 1751 | 140.595 |
| 1752 | 222.117 |
| 1753 | 103.97  |
| 1754 | 151.229 |
| 1755 | 27.174  |
| 1756 | 22.448  |
| 1757 | 76.796  |
| 1758 | 54.348  |
| 1759 | 51.985  |
| 1760 | 146.503 |
| 1761 | 278.828 |
| 1762 | 200.851 |
| 1763 | 48.44   |
| 1764 | 203.214 |
| 1765 | 311.909 |
| 1766 | 451.323 |
| 1767 | 131.144 |

|      |         |
|------|---------|
| 1768 | 152.41  |
| 1769 | 20.085  |
| 1770 | 49.622  |
| 1771 | 28.355  |
| 1772 | 144.14  |
| 1773 | 59.074  |
| 1774 | 278.828 |
| 1775 | 151.229 |
| 1776 | 258.743 |
| 1777 | 342.628 |
| 1778 | 87.429  |
| 1779 | 200.851 |
| 1780 | 101.607 |
| 1781 | 63.8    |
| 1782 | 419.423 |
| 1783 | 66.163  |
| 1784 | 49.622  |
| 1785 | 98.062  |
| 1786 | 96.881  |
| 1787 | 135.87  |
| 1788 | 147.684 |
| 1789 | 428.875 |
| 1790 | 92.155  |
| 1791 | 242.202 |
| 1792 | 137.051 |
| 1793 | 108.696 |
| 1794 | 238.658 |
| 1795 | 254.017 |
| 1796 | 60.255  |
| 1797 | 219.754 |
| 1798 | 152.41  |
| 1799 | 205.577 |
| 1800 | 99.244  |
| 1801 | 105.151 |
| 1802 | 164.225 |
| 1803 | 158.318 |
| 1804 | 42.533  |
| 1805 | 474.953 |
| 1806 | 90.974  |
| 1807 | 160.681 |
| 1808 | 120.51  |
| 1809 | 125.236 |
| 1810 | 962.902 |
| 1811 | 161.862 |
| 1812 | 285.917 |
| 1813 | 142.958 |
| 1814 | 93.336  |

|      |         |
|------|---------|
| 1815 | 57.892  |
| 1816 | 317.817 |
| 1817 | 225.662 |
| 1818 | 142.958 |
| 1819 | 121.692 |
| 1820 | 138.233 |
| 1821 | 264.65  |
| 1822 | 33.081  |
| 1823 | 116.966 |
| 1824 | 210.302 |
| 1825 | 44.896  |
| 1826 | 187.854 |
| 1827 | 356.805 |
| 1828 | 132.325 |
| 1829 | 155.955 |
| 1830 | 38.989  |
| 1831 | 56.711  |
| 1832 | 187.854 |
| 1833 | 210.302 |
| 1834 | 155.955 |
| 1835 | 31.9    |
| 1836 | 102.788 |
| 1837 | 22.448  |
| 1838 | 88.611  |
| 1839 | 99.244  |
| 1840 | 125.236 |
| 1841 | 96.881  |
| 1842 | 243.384 |
| 1843 | 128.781 |
| 1844 | 33.081  |
| 1845 | 115.784 |
| 1846 | 128.781 |
| 1847 | 105.151 |
| 1848 | 186.673 |
| 1849 | 150.047 |
| 1850 | 41.352  |
| 1851 | 135.87  |
| 1852 | 191.399 |
| 1853 | 170.132 |
| 1854 | 40.17   |
| 1855 | 137.051 |
| 1856 | 145.321 |
| 1857 | 55.529  |
| 1858 | 211.484 |
| 1859 | 205.577 |
| 1860 | 37.807  |
| 1861 | 100.425 |



|      |         |
|------|---------|
| 1862 | 90.974  |
| 1863 | 203.214 |
| 1864 | 88.611  |
| 1865 | 961.72  |
| 1866 | 246.928 |
| 1867 | 138.233 |
| 1868 | 637.996 |
| 1869 | 180.766 |
| 1870 | 47.259  |
| 1871 | 647.448 |
| 1872 | 251.654 |
| 1873 | 67.344  |
| 1874 | 118.147 |
| 1875 | 172.495 |
| 1876 | 165.406 |
| 1877 | 63.8    |
| 1878 | 54.348  |
| 1879 | 89.792  |
| 1880 | 30.718  |
| 1881 | 77.977  |
| 1882 | 102.788 |
| 1883 | 179.584 |
| 1884 | 62.618  |
| 1885 | 303.639 |
| 1886 | 854.206 |
| 1887 | 75.614  |
| 1888 | 419.423 |
| 1889 | 75.614  |
| 1890 | 203.214 |
| 1891 | 401.701 |
| 1892 | 31.9    |
| 1893 | 56.711  |
| 1894 | 35.444  |
| 1895 | 184.31  |
| 1896 | 83.885  |
| 1897 | 100.425 |
| 1898 | 131.144 |
| 1899 | 121.692 |
| 1900 | 61.437  |
| 1901 | 191.399 |
| 1902 | 66.163  |
| 1903 | 47.259  |
| 1904 | 194.943 |
| 1905 | 38.989  |
| 1906 | 178.403 |
| 1907 | 200.851 |
| 1908 | 167.769 |

|      |         |
|------|---------|
| 1909 | 61.437  |
| 1910 | 93.336  |
| 1911 | 230.388 |
| 1912 | 146.503 |
| 1913 | 243.384 |
| 1914 | 233.932 |
| 1915 | 341.446 |
| 1916 | 178.403 |
| 1917 | 76.796  |
| 1918 | 89.792  |
| 1919 | 370.983 |
| 1920 | 41.352  |
| 1921 | 327.268 |
| 1922 | 38.989  |
| 1923 | 139.414 |
| 1924 | 609.641 |
| 1925 | 38.989  |
| 1926 | 107.514 |
| 1927 | 294.187 |
| 1928 | 56.711  |
| 1929 | 190.217 |
| 1930 | 343.809 |
| 1931 | 49.622  |
| 1932 | 112.24  |
| 1933 | 43.715  |
| 1934 | 92.155  |
| 1935 | 131.144 |
| 1936 | 251.654 |
| 1937 | 51.985  |
| 1938 | 67.344  |
| 1939 | 167.769 |
| 1940 | 47.259  |
| 1941 | 184.31  |
| 1942 | 180.766 |
| 1943 | 21.267  |
| 1944 | 350.898 |
| 1945 | 106.333 |
| 1946 | 125.236 |
| 1947 | 94.518  |
| 1948 | 129.962 |
| 1949 | 23.629  |
| 1950 | 248.11  |
| 1951 | 171.314 |
| 1952 | 167.769 |
| 1953 | 27.174  |
| 1954 | 77.977  |
| 1955 | 168.951 |

|      |         |
|------|---------|
| 1956 | 36.626  |
| 1957 | 293.006 |
| 1958 | 93.336  |
| 1959 | 57.892  |
| 1960 | 79.159  |
| 1961 | 90.974  |
| 1962 | 461.957 |
| 1963 | 163.043 |
| 1964 | 24.811  |
| 1965 | 394.612 |
| 1966 | 575.378 |
| 1967 | 197.306 |
| 1968 | 99.244  |
| 1969 | 152.41  |
| 1970 | 116.966 |
| 1971 | 69.707  |
| 1972 | 20.085  |
| 1973 | 37.807  |
| 1974 | 346.172 |
| 1975 | 427.694 |
| 1976 | 101.607 |
| 1977 | 66.163  |
| 1978 | 407.609 |
| 1979 | 401.701 |
| 1980 | 28.355  |
| 1981 | 140.595 |
| 1982 | 131.144 |
| 1983 | 131.144 |
| 1984 | 47.259  |
| 1985 | 459.594 |
| 1986 | 29.537  |
| 1987 | 95.699  |
| 1988 | 363.894 |
| 1989 | 92.155  |
| 1990 | 128.781 |
| 1991 | 133.507 |
| 1992 | 94.518  |
| 1993 | 50.803  |
| 1994 | 61.437  |
| 1995 | 288.28  |
| 1996 | 178.403 |
| 1997 | 217.391 |
| 1998 | 93.336  |
| 1999 | 95.699  |
| 2000 | 79.159  |
| 2001 | 122.873 |
| 2002 | 31.9    |

|      |         |
|------|---------|
| 2003 | 197.306 |
| 2004 | 21.267  |
| 2005 | 56.711  |
| 2006 | 125.236 |
| 2007 | 320.18  |
| 2008 | 134.688 |
| 2009 | 178.403 |
| 2010 | 90.974  |
| 2011 | 219.754 |
| 2012 | 138.233 |
| 2013 | 63.8    |
| 2014 | 857.75  |
| 2015 | 103.97  |
| 2016 | 368.62  |
| 2017 | 53.166  |
| 2018 | 36.626  |
| 2019 | 362.713 |
| 2020 | 23.629  |
| 2021 | 102.788 |
| 2022 | 912.098 |
| 2023 | 102.788 |
| 2024 | 92.155  |
| 2025 | 69.707  |
| 2026 | 171.314 |
| 2027 | 205.577 |
| 2028 | 173.677 |
| 2029 | 168.951 |
| 2030 | 254.017 |
| 2031 | 138.233 |
| 2032 | 153.592 |
| 2033 | 64.981  |
| 2034 | 69.707  |
| 2035 | 101.607 |
| 2036 | 28.355  |
| 2037 | 457.231 |
| 2038 | 77.977  |
| 2039 | 43.715  |
| 2040 | 98.062  |
| 2041 | 183.129 |
| 2042 | 108.696 |
| 2043 | 147.684 |
| 2044 | 133.507 |
| 2045 | 30.718  |
| 2046 | 255.198 |
| 2047 | 239.839 |
| 2048 | 304.82  |
| 2049 | 53.166  |

|      |         |
|------|---------|
| 2050 | 43.715  |
| 2051 | 146.503 |
| 2052 | 74.433  |
| 2053 | 326.087 |
| 2054 | 22.448  |
| 2055 | 170.132 |
| 2056 | 171.314 |
| 2057 | 172.495 |
| 2058 | 82.703  |
| 2059 | 42.533  |
| 2060 | 54.348  |
| 2061 | 37.807  |
| 2062 | 200.851 |
| 2063 | 22.448  |
| 2064 | 181.947 |
| 2065 | 122.873 |
| 2066 | 307.183 |
| 2067 | 326.087 |
| 2068 | 101.607 |
| 2069 | 239.839 |
| 2070 | 356.805 |
| 2071 | 44.896  |
| 2072 | 213.847 |
| 2073 | 88.611  |
| 2074 | 356.805 |
| 2075 | 34.263  |
| 2076 | 53.166  |
| 2077 | 271.739 |
| 2078 | 70.888  |
| 2079 | 50.803  |
| 2080 | 48.44   |
| 2081 | 153.592 |
| 2082 | 38.989  |
| 2083 | 255.198 |
| 2084 | 640.359 |
| 2085 | 25.992  |
| 2086 | 211.484 |
| 2087 | 257.561 |
| 2088 | 77.977  |
| 2089 | 359.168 |
| 2090 | 243.384 |
| 2091 | 190.217 |
| 2092 | 122.873 |
| 2093 | 56.711  |
| 2094 | 497.401 |
| 2095 | 103.97  |
| 2096 | 172.495 |

|      |         |
|------|---------|
| 2097 | 151.229 |
| 2098 | 122.873 |
| 2099 | 64.981  |
| 2100 | 56.711  |
| 2101 | 198.488 |
| 2102 | 282.372 |
| 2103 | 126.418 |
| 2104 | 334.357 |
| 2105 | 159.499 |
| 2106 | 148.866 |
| 2107 | 264.65  |
| 2108 | 137.051 |
| 2109 | 193.762 |
| 2110 | 216.21  |
| 2111 | 159.499 |
| 2112 | 49.622  |
| 2113 | 105.151 |
| 2114 | 35.444  |
| 2115 | 94.518  |
| 2116 | 173.677 |
| 2117 | 94.518  |
| 2118 | 249.291 |
| 2119 | 193.762 |
| 2120 | 81.522  |
| 2121 | 54.348  |
| 2122 | 167.769 |
| 2123 | 109.877 |
| 2124 | 77.977  |
| 2125 | 93.336  |
| 2126 | 147.684 |
| 2127 | 164.225 |
| 2128 | 89.792  |
| 2129 | 48.44   |
| 2130 | 333.176 |
| 2131 | 28.355  |
| 2132 | 166.588 |
| 2133 | 133.507 |
| 2134 | 138.233 |
| 2135 | 160.681 |
| 2136 | 152.41  |
| 2137 | 86.248  |
| 2138 | 79.159  |
| 2139 | 105.151 |
| 2140 | 127.599 |
| 2141 | 59.074  |
| 2142 | 163.043 |
| 2143 | 28.355  |

|      |         |
|------|---------|
| 2144 | 210.302 |
| 2145 | 89.792  |
| 2146 | 115.784 |
| 2147 | 22.448  |
| 2148 | 459.594 |
| 2149 | 109.877 |
| 2150 | 213.847 |
| 2151 | 244.565 |
| 2152 | 166.588 |
| 2153 | 81.522  |
| 2154 | 88.611  |
| 2155 | 77.977  |
| 2156 | 300.095 |
| 2157 | 172.495 |
| 2158 | 80.34   |
| 2159 | 217.391 |
| 2160 | 356.805 |
| 2161 | 153.592 |
| 2162 | 30.718  |
| 2163 | 343.809 |
| 2164 | 70.888  |
| 2165 | 160.681 |
| 2166 | 212.665 |
| 2167 | 48.44   |
| 2168 | 373.346 |
| 2169 | 249.291 |
| 2170 | 79.159  |
| 2171 | 161.862 |
| 2172 | 138.233 |
| 2173 | 73.251  |
| 2174 | 294.187 |
| 2175 | 30.718  |
| 2176 | 22.448  |
| 2177 | 116.966 |
| 2178 | 64.981  |
| 2179 | 125.236 |
| 2180 | 223.299 |
| 2181 | 239.839 |
| 2182 | 388.705 |
| 2183 | 40.17   |
| 2184 | 184.31  |
| 2185 | 139.414 |
| 2186 | 47.259  |
| 2187 | 135.87  |
| 2188 | 94.518  |
| 2189 | 55.529  |
| 2190 | 427.694 |

|      |         |
|------|---------|
| 2191 | 103.97  |
| 2192 | 223.299 |
| 2193 | 119.329 |
| 2194 | 124.055 |
| 2195 | 187.854 |
| 2196 | 23.629  |
| 2197 | 474.953 |
| 2198 | 120.51  |
| 2199 | 555.293 |
| 2200 | 239.839 |
| 2201 | 157.136 |
| 2202 | 112.24  |
| 2203 | 176.04  |
| 2204 | 106.333 |
| 2205 | 90.974  |
| 2206 | 94.518  |
| 2207 | 34.263  |
| 2208 | 69.707  |
| 2209 | 165.406 |
| 2210 | 35.444  |
| 2211 | 47.259  |
| 2212 | 49.622  |
| 2213 | 20.085  |
| 2214 | 277.647 |
| 2215 | 209.121 |
| 2216 | 77.977  |
| 2217 | 61.437  |
| 2218 | 139.414 |
| 2219 | 165.406 |
| 2220 | 167.769 |
| 2221 | 202.032 |
| 2222 | 137.051 |
| 2223 | 146.503 |
| 2224 | 134.688 |
| 2225 | 126.418 |
| 2226 | 116.966 |
| 2227 | 187.854 |
| 2228 | 159.499 |
| 2229 | 113.422 |
| 2230 | 185.491 |
| 2231 | 274.102 |
| 2232 | 142.958 |
| 2233 | 199.669 |
| 2234 | 589.556 |
| 2235 | 237.476 |
| 2236 | 428.875 |
| 2237 | 180.766 |



|      |          |
|------|----------|
| 2238 | 36.626   |
| 2239 | 204.395  |
| 2240 | 33.081   |
| 2241 | 50.803   |
| 2242 | 141.777  |
| 2243 | 74.433   |
| 2244 | 538.752  |
| 2245 | 55.529   |
| 2246 | 76.796   |
| 2247 | 628.544  |
| 2248 | 121.692  |
| 2249 | 34.263   |
| 2250 | 482.042  |
| 2251 | 95.699   |
| 2252 | 77.977   |
| 2253 | 113.422  |
| 2254 | 178.403  |
| 2255 | 95.699   |
| 2256 | 451.323  |
| 2257 | 235.113  |
| 2258 | 1007.798 |
| 2259 | 316.635  |
| 2260 | 47.259   |
| 2261 | 68.526   |
| 2262 | 166.588  |
| 2263 | 133.507  |
| 2264 | 48.44    |
| 2265 | 353.261  |
| 2266 | 225.662  |
| 2267 | 460.775  |
| 2268 | 177.221  |
| 2269 | 95.699   |
| 2270 | 844.754  |
| 2271 | 988.894  |
| 2272 | 120.51   |
| 2273 | 99.244   |
| 2274 | 29.537   |
| 2275 | 38.989   |
| 2276 | 122.873  |
| 2277 | 99.244   |
| 2278 | 438.327  |
| 2279 | 118.147  |
| 2280 | 176.04   |
| 2281 | 53.166   |
| 2282 | 51.985   |
| 2283 | 128.781  |
| 2284 | 183.129  |

|      |         |
|------|---------|
| 2285 | 203.214 |
| 2286 | 76.796  |
| 2287 | 210.302 |
| 2288 | 131.144 |
| 2289 | 739.603 |
| 2290 | 107.514 |
| 2291 | 95.699  |
| 2292 | 112.24  |
| 2293 | 113.422 |
| 2294 | 233.932 |
| 2295 | 90.974  |
| 2296 | 477.316 |
| 2297 | 210.302 |
| 2298 | 138.233 |
| 2299 | 76.796  |
| 2300 | 114.603 |
| 2301 | 82.703  |
| 2302 | 550.567 |
| 2303 | 142.958 |
| 2304 | 54.348  |
| 2305 | 430.057 |
| 2306 | 81.522  |
| 2307 | 421.786 |
| 2308 | 107.514 |
| 2309 | 176.04  |
| 2310 | 59.074  |
| 2311 | 68.526  |
| 2312 | 154.773 |
| 2313 | 166.588 |
| 2314 | 49.622  |
| 2315 | 388.705 |
| 2316 | 226.843 |
| 2317 | 29.537  |
| 2318 | 36.626  |
| 2319 | 161.862 |
| 2320 | 112.24  |
| 2321 | 219.754 |
| 2322 | 20.085  |
| 2323 | 473.771 |
| 2324 | 158.318 |
| 2325 | 69.707  |
| 2326 | 79.159  |
| 2327 | 59.074  |
| 2328 | 55.529  |
| 2329 | 132.325 |
| 2330 | 159.499 |
| 2331 | 56.711  |

|      |          |
|------|----------|
| 2332 | 98.062   |
| 2333 | 138.233  |
| 2334 | 28.355   |
| 2335 | 173.677  |
| 2336 | 121.692  |
| 2337 | 350.898  |
| 2338 | 155.955  |
| 2339 | 31.9     |
| 2340 | 447.779  |
| 2341 | 147.684  |
| 2342 | 115.784  |
| 2343 | 134.688  |
| 2344 | 48.44    |
| 2345 | 204.395  |
| 2346 | 60.255   |
| 2347 | 179.584  |
| 2348 | 290.643  |
| 2349 | 108.696  |
| 2350 | 205.577  |
| 2351 | 166.588  |
| 2352 | 238.658  |
| 2353 | 515.123  |
| 2354 | 73.251   |
| 2355 | 144.14   |
| 2356 | 515.123  |
| 2357 | 81.522   |
| 2358 | 53.166   |
| 2359 | 608.459  |
| 2360 | 43.715   |
| 2361 | 131.144  |
| 2362 | 67.344   |
| 2363 | 22.448   |
| 2364 | 50.803   |
| 2365 | 41.352   |
| 2366 | 146.503  |
| 2367 | 1415.406 |
| 2368 | 33.081   |
| 2369 | 255.198  |
| 2370 | 21.267   |
| 2371 | 163.043  |
| 2372 | 127.599  |
| 2373 | 22.448   |
| 2374 | 56.711   |
| 2375 | 164.225  |
| 2376 | 802.221  |
| 2377 | 181.947  |
| 2378 | 264.65   |

|      |          |
|------|----------|
| 2379 | 281.191  |
| 2380 | 116.966  |
| 2381 | 472.59   |
| 2382 | 132.325  |
| 2383 | 33.081   |
| 2384 | 72.07    |
| 2385 | 51.985   |
| 2386 | 126.418  |
| 2387 | 242.202  |
| 2388 | 210.302  |
| 2389 | 90.974   |
| 2390 | 25.992   |
| 2391 | 107.514  |
| 2392 | 171.314  |
| 2393 | 160.681  |
| 2394 | 705.34   |
| 2395 | 114.603  |
| 2396 | 461.957  |
| 2397 | 107.514  |
| 2398 | 198.488  |
| 2399 | 96.881   |
| 2400 | 173.677  |
| 2401 | 170.132  |
| 2402 | 62.618   |
| 2403 | 398.157  |
| 2404 | 43.715   |
| 2405 | 121.692  |
| 2406 | 95.699   |
| 2407 | 37.807   |
| 2408 | 67.344   |
| 2409 | 108.696  |
| 2410 | 263.469  |
| 2411 | 206.758  |
| 2412 | 129.962  |
| 2413 | 80.34    |
| 2414 | 73.251   |
| 2415 | 348.535  |
| 2416 | 587.193  |
| 2417 | 64.981   |
| 2418 | 89.792   |
| 2419 | 81.522   |
| 2420 | 1465.028 |
| 2421 | 88.611   |
| 2422 | 35.444   |
| 2423 | 54.348   |
| 2424 | 81.522   |
| 2425 | 167.769  |

|      |          |
|------|----------|
| 2426 | 27.174   |
| 2427 | 73.251   |
| 2428 | 155.955  |
| 2429 | 526.938  |
| 2430 | 138.233  |
| 2431 | 176.04   |
| 2432 | 304.82   |
| 2433 | 69.707   |
| 2434 | 67.344   |
| 2435 | 271.739  |
| 2436 | 237.476  |
| 2437 | 59.074   |
| 2438 | 108.696  |
| 2439 | 328.45   |
| 2440 | 155.955  |
| 2441 | 92.155   |
| 2442 | 113.422  |
| 2443 | 428.875  |
| 2444 | 64.981   |
| 2445 | 41.352   |
| 2446 | 321.361  |
| 2447 | 138.233  |
| 2448 | 1031.427 |
| 2449 | 166.588  |
| 2450 | 142.958  |
| 2451 | 249.291  |
| 2452 | 173.677  |
| 2453 | 88.611   |
| 2454 | 92.155   |
| 2455 | 88.611   |
| 2456 | 194.943  |
| 2457 | 158.318  |
| 2458 | 209.121  |
| 2459 | 73.251   |
| 2460 | 532.845  |
| 2461 | 22.448   |
| 2462 | 223.299  |
| 2463 | 35.444   |
| 2464 | 35.444   |
| 2465 | 77.977   |
| 2466 | 106.333  |
| 2467 | 161.862  |
| 2468 | 47.259   |
| 2469 | 616.73   |
| 2470 | 544.66   |
| 2471 | 173.677  |
| 2472 | 77.977   |

|      |          |
|------|----------|
| 2473 | 202.032  |
| 2474 | 63.8     |
| 2475 | 151.229  |
| 2476 | 401.701  |
| 2477 | 152.41   |
| 2478 | 134.688  |
| 2479 | 158.318  |
| 2480 | 154.773  |
| 2481 | 225.662  |
| 2482 | 244.565  |
| 2483 | 241.021  |
| 2484 | 1021.975 |
| 2485 | 447.779  |
| 2486 | 79.159   |
| 2487 | 310.728  |
| 2488 | 127.599  |
| 2489 | 47.259   |
| 2490 | 66.163   |
| 2491 | 75.614   |
| 2492 | 270.558  |
| 2493 | 431.238  |
| 2494 | 60.255   |
| 2495 | 164.225  |
| 2496 | 25.992   |
| 2497 | 171.314  |
| 2498 | 27.174   |
| 2499 | 120.51   |
| 2500 | 278.828  |
| 2501 | 630.907  |
| 2502 | 152.41   |
| 2503 | 1056.238 |
| 2504 | 57.892   |
| 2505 | 251.654  |
| 2506 | 161.862  |
| 2507 | 154.773  |
| 2508 | 144.14   |
| 2509 | 144.14   |
| 2510 | 62.618   |
| 2511 | 249.291  |
| 2512 | 50.803   |
| 2513 | 99.244   |
| 2514 | 21.267   |
| 2515 | 62.618   |
| 2516 | 409.972  |
| 2517 | 186.673  |
| 2518 | 654.537  |
| 2519 | 30.718   |

|      |          |
|------|----------|
| 2520 | 223.299  |
| 2521 | 105.151  |
| 2522 | 148.866  |
| 2523 | 88.611   |
| 2524 | 72.07    |
| 2525 | 190.217  |
| 2526 | 34.263   |
| 2527 | 20.085   |
| 2528 | 148.866  |
| 2529 | 422.968  |
| 2530 | 53.166   |
| 2531 | 128.781  |
| 2532 | 1013.705 |
| 2533 | 47.259   |
| 2534 | 153.592  |
| 2535 | 114.603  |
| 2536 | 211.484  |
| 2537 | 27.174   |
| 2538 | 129.962  |
| 2539 | 37.807   |
| 2540 | 68.526   |
| 2541 | 88.611   |
| 2542 | 90.974   |
| 2543 | 119.329  |
| 2544 | 60.255   |
| 2545 | 142.958  |
| 2546 | 215.028  |
| 2547 | 412.335  |
| 2548 | 655.718  |
| 2549 | 743.147  |
| 2550 | 57.892   |
| 2551 | 132.325  |
| 2552 | 61.437   |
| 2553 | 120.51   |
| 2554 | 383.979  |
| 2555 | 354.442  |
| 2556 | 101.607  |
| 2557 | 138.233  |
| 2558 | 113.422  |
| 2559 | 70.888   |
| 2560 | 215.028  |
| 2561 | 2360.586 |
| 2562 | 90.974   |
| 2563 | 880.198  |
| 2564 | 27.174   |
| 2565 | 70.888   |
| 2566 | 217.391  |

|      |         |
|------|---------|
| 2567 | 88.611  |
| 2568 | 229.206 |
| 2569 | 860.113 |
| 2570 | 103.97  |
| 2571 | 76.796  |
| 2572 | 33.081  |
| 2573 | 24.811  |
| 2574 | 95.699  |
| 2575 | 72.07   |
| 2576 | 199.669 |
| 2577 | 75.614  |
| 2578 | 205.577 |
| 2579 | 328.45  |
| 2580 | 20.085  |
| 2581 | 148.866 |
| 2582 | 99.244  |
| 2583 | 151.229 |
| 2584 | 28.355  |
| 2585 | 80.34   |
| 2586 | 111.059 |
| 2587 | 141.777 |
| 2588 | 20.085  |
| 2589 | 205.577 |
| 2590 | 60.255  |
| 2591 | 249.291 |
| 2592 | 126.418 |
| 2593 | 59.074  |
| 2594 | 339.083 |
| 2595 | 113.422 |
| 2596 | 139.414 |
| 2597 | 47.259  |
| 2598 | 147.684 |
| 2599 | 446.597 |
| 2600 | 126.418 |
| 2601 | 76.796  |
| 2602 | 22.448  |
| 2603 | 95.699  |
| 2604 | 194.943 |
| 2605 | 178.403 |
| 2606 | 190.217 |
| 2607 | 193.762 |
| 2608 | 22.448  |
| 2609 | 53.166  |
| 2610 | 424.149 |
| 2611 | 35.444  |
| 2612 | 147.684 |
| 2613 | 34.263  |



|      |         |
|------|---------|
| 2614 | 245.747 |
| 2615 | 293.006 |
| 2616 | 94.518  |
| 2617 | 158.318 |
| 2618 | 199.669 |
| 2619 | 145.321 |
| 2620 | 184.31  |
| 2621 | 96.881  |
| 2622 | 376.89  |
| 2623 | 93.336  |
| 2624 | 33.081  |
| 2625 | 155.955 |
| 2626 | 67.344  |
| 2627 | 82.703  |
| 2628 | 349.716 |
| 2629 | 24.811  |
| 2630 | 218.573 |
| 2631 | 94.518  |
| 2632 | 119.329 |
| 2633 | 99.244  |
| 2634 | 164.225 |
| 2635 | 207.94  |
| 2636 | 185.491 |
| 2637 | 212.665 |
| 2638 | 359.168 |
| 2639 | 81.522  |
| 2640 | 249.291 |
| 2641 | 197.306 |
| 2642 | 31.9    |
| 2643 | 43.715  |
| 2644 | 445.416 |
| 2645 | 329.631 |
| 2646 | 205.577 |
| 2647 | 132.325 |
| 2648 | 99.244  |
| 2649 | 167.769 |
| 2650 | 119.329 |
| 2651 | 147.684 |
| 2652 | 48.44   |
| 2653 | 68.526  |
| 2654 | 77.977  |
| 2655 | 284.735 |
| 2656 | 167.769 |
| 2657 | 336.72  |
| 2658 | 333.176 |
| 2659 | 101.607 |
| 2660 | 90.974  |

|      |         |
|------|---------|
| 2661 | 55.529  |
| 2662 | 157.136 |
| 2663 | 282.372 |
| 2664 | 87.429  |
| 2665 | 122.873 |
| 2666 | 46.078  |
| 2667 | 148.866 |
| 2668 | 252.836 |
| 2669 | 41.352  |
| 2670 | 72.07   |
| 2671 | 96.881  |
| 2672 | 183.129 |
| 2673 | 887.287 |
| 2674 | 43.715  |
| 2675 | 95.699  |
| 2676 | 438.327 |
| 2677 | 249.291 |
| 2678 | 354.442 |
| 2679 | 43.715  |
| 2680 | 114.603 |
| 2681 | 170.132 |
| 2682 | 129.962 |
| 2683 | 50.803  |
| 2684 | 133.507 |
| 2685 | 300.095 |
| 2686 | 180.766 |
| 2687 | 20.085  |
| 2688 | 31.9    |
| 2689 | 440.69  |
| 2690 | 76.796  |
| 2691 | 203.214 |
| 2692 | 270.558 |
| 2693 | 31.9    |
| 2694 | 96.881  |
| 2695 | 38.989  |
| 2696 | 66.163  |
| 2697 | 600.189 |
| 2698 | 37.807  |
| 2699 | 259.924 |
| 2700 | 231.569 |
| 2701 | 194.943 |
| 2702 | 158.318 |
| 2703 | 272.921 |
| 2704 | 112.24  |
| 2705 | 155.955 |
| 2706 | 129.962 |
| 2707 | 41.352  |

|      |         |
|------|---------|
| 2708 | 73.251  |
| 2709 | 114.603 |
| 2710 | 64.981  |
| 2711 | 105.151 |
| 2712 | 252.836 |
| 2713 | 137.051 |
| 2714 | 160.681 |
| 2715 | 57.892  |
| 2716 | 94.518  |
| 2717 | 315.454 |
| 2718 | 331.994 |
| 2719 | 88.611  |
| 2720 | 158.318 |
| 2721 | 173.677 |
| 2722 | 60.255  |
| 2723 | 257.561 |
| 2724 | 135.87  |
| 2725 | 56.711  |
| 2726 | 226.843 |
| 2727 | 391.068 |
| 2728 | 79.159  |
| 2729 | 215.028 |
| 2730 | 119.329 |
| 2731 | 77.977  |
| 2732 | 231.569 |
| 2733 | 163.043 |
| 2734 | 61.437  |
| 2735 | 49.622  |
| 2736 | 60.255  |
| 2737 | 139.414 |
| 2738 | 98.062  |
| 2739 | 174.858 |
| 2740 | 209.121 |
| 2741 | 88.611  |
| 2742 | 75.614  |
| 2743 | 105.151 |
| 2744 | 54.348  |
| 2745 | 86.248  |
| 2746 | 23.629  |
| 2747 | 37.807  |
| 2748 | 70.888  |
| 2749 | 106.333 |
| 2750 | 62.618  |
| 2751 | 46.078  |
| 2752 | 70.888  |
| 2753 | 38.989  |

**Figure S2.** Surface appearance of anodized samples for 25-min and 45-min anodizing before immersion (upper images) and after 75 h of immersion in 0.01 M NaCl (lower images).

Black circles delimit the O-ring (so the immersed area). A white deposit and some small black pits appeared on the 25 min anodizing (75 h immersion). No major change on the 45-min surface after 75 h of immersion. Black pits near the O-ring are attributed to crevice corrosion.

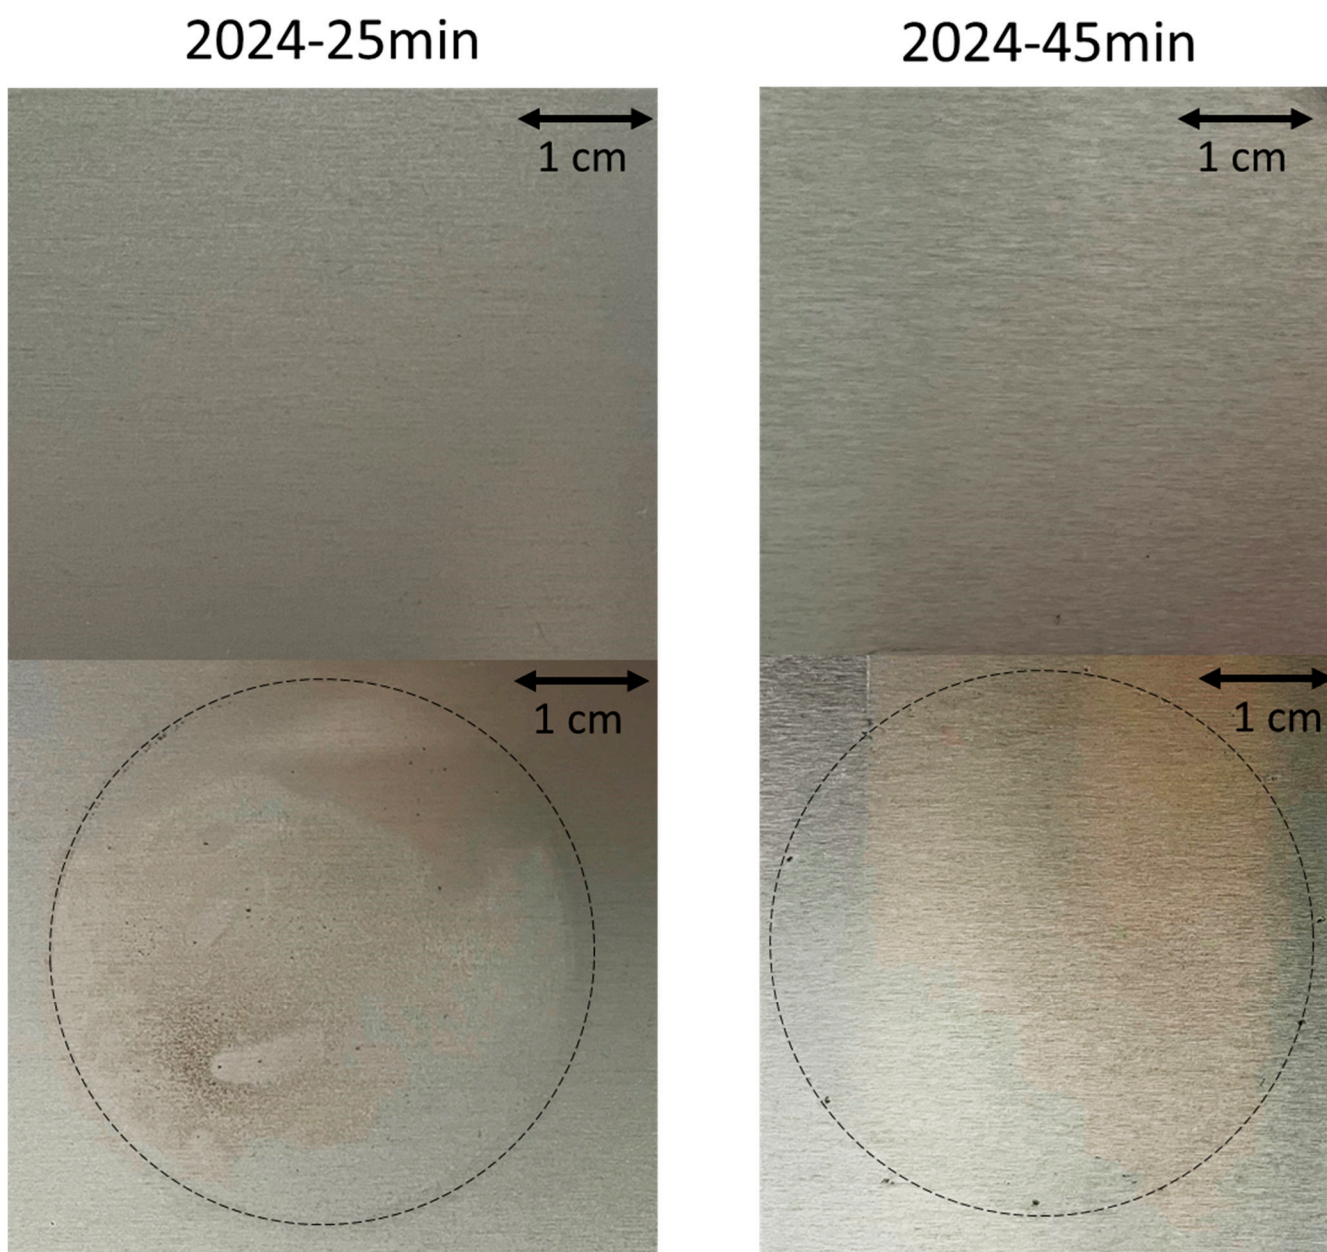

**Figure S3.** Salt spray test results after 500h of exposure.

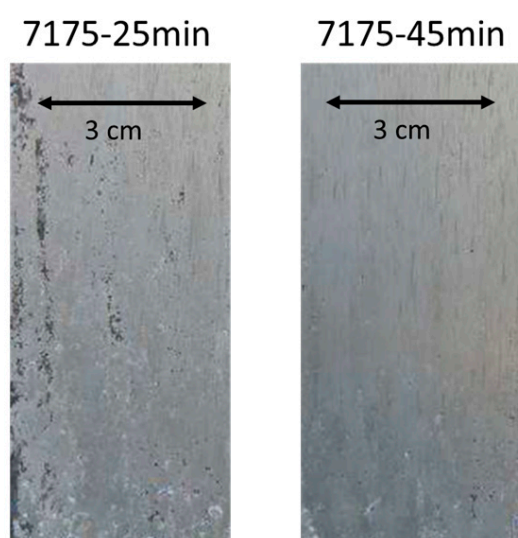

Supplement: s1 [file s1]
